# Supplementary material for: The C. elegans 3’-UTRome V2: an updated genomic resource to study 3’-UTR biology
Source: bioRxiv or medRxiv preprint supplement (doi:10.1101/704098), 2019-10-04

Additional File 1 for:

**The *C. elegans* 3'UTRome V2: an updated genomic resource to study 3'UTR biology**

Steber HS<sup>1,2</sup>, Gallante C<sup>3</sup>, O'Brien S<sup>2</sup>, Chiu P.-L<sup>4</sup>, Mangone M\*<sup>1,2</sup>.

<sup>1</sup>Molecular and Cellular Biology Graduate Program, School of Life Sciences 427 East Tyler Mall Tempe, AZ 85287 4501.

<sup>2</sup>Virginia G. Piper Center for Personalized Diagnostics, The Biodesign Institute at Arizona State University, 1001 S McAllister Ave, Tempe, AZ, USA

<sup>3</sup>Barrett, The Honors College, Arizona State University, 751 E Lemon Mall, Tempe, AZ 85281

<sup>4</sup>Center for Applied Structural Discovery, The Biodesign Institute at Arizona State University, 1001 S McAllister Ave, Tempe, AZ, USA

- To whom correspondence should be addressed. Tel: +1(480) 965-7957; Fax: +1(480) 965-3051; Email: mangone@asu.edu

Present Address: Marco Mangone, Arizona State University, Biodesign Institute Building A, 1001 S McAllister Ave, Tempe, AZ 85281 USA

**This PDF includes:**

**Figures S1-S9**

## Table of Contents

### Additional File 1

|                                                                                              |    |
|----------------------------------------------------------------------------------------------|----|
| <b>Figure S1:</b> Protein alignment of members of the CPC complex<br>in five species .....   | 3  |
| <b>Figure S2:</b> Results of the RNAi experiments of the <i>C. elegans</i> CPC.....          | 14 |
| <b>Figure S3:</b> Bioinformatic pipeline used in this study .....                            | 15 |
| <b>Figure S4:</b> PAS site usage in genes with multiple 3'UTR isoforms .....                 | 16 |
| <b>Figure S5:</b> Detection of the 'UGUA' element in <i>C. elegans</i> 3'UTRs .....          | 17 |
| <b>Figure S6:</b> Nucleotide binding site of the human<br>CPSF160-WDR33-CPSF30 complex ..... | 18 |
| <b>Figure S7:</b> <i>In vivo</i> cleavage assay for M03A1.3 .....                            | 19 |
| <b>Figure S8:</b> <i>In vivo</i> cleavage assay for Y106G6H.9 .....                          | 20 |
| <b>Figure S9:</b> <i>In vivo</i> cleavage assay for <i>ges-1</i> .....                       | 21 |

CPSF complex

*cpsf-1* (CPSF160)

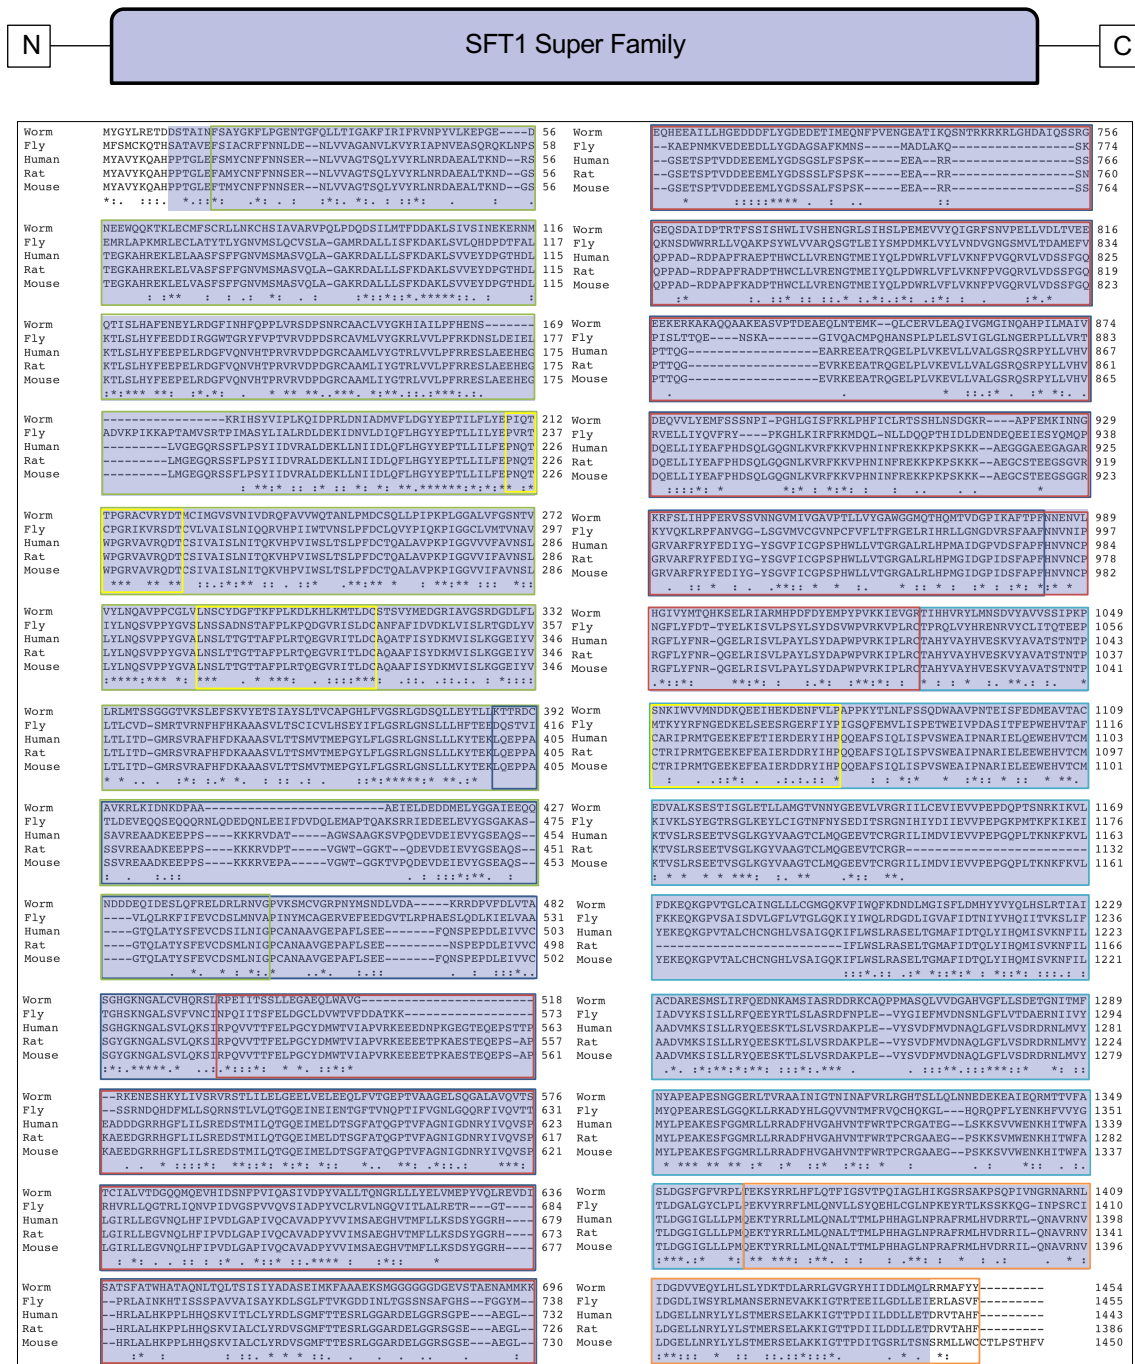

**Supplemental Fig. S1: Protein alignment of members of the CPC complex in five organisms.** Amino acid sequence alignment for the members of the CPC from five organisms produced with Clustal Omega Multiple Sequence Alignment. Conserved domains produced with the Batch Conserved Domain Search on NCBI are represented by the highlighted regions of each figure. Known domains determined from previously published literature are outlined.

CPSF Complex

**cpsf-2 (CPSF-100)**

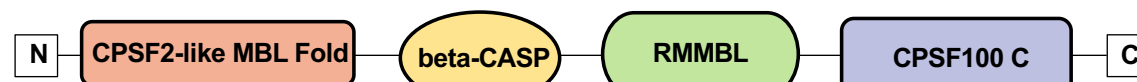

|       |                                                            |     |       |                                                             |     |
|-------|------------------------------------------------------------|-----|-------|-------------------------------------------------------------|-----|
| Worm  | MTSIIKLVKFSAGKDEGLCYLLQVDDGYILLDCGWDERFLQVFEELKFFPKISAVLI  | 60  | Worm  | KASFFKTKKSFMPFYIEEKVKDDYGEVIKPEDYTVISIKDLR-----KGQNKD       | 528 |
| Fly   | MTSIIKLVKFSAGKDEGLCYLLQVDDGYILLDCGWDERFLQVFEELKFFPKISAVLI  | 60  | Fly   | HSGFFKSNKRHMVFPYHEEKVKDEYGEIINLDYRADIATGYEFPMEEQNKEMVKE     | 505 |
| Human | MTSIIKLVKFSAGKDEGLCYLLQVDDGYILLDCGWDERFLQVFEELKFFPKISAVLI  | 60  | Human | KGSFFKQAKKSYMPFAPAEERIKWDEYGEIIPKEDFLVPELQATE-----EKS       | 500 |
| Mouse | MTSIIKLVKFSAGKDEGLCYLLQVDDGYILLDCGWDERFLQVFEELKFFPKISAVLI  | 60  | Mouse | KGSFFKQAKKSYMPFAPAEERIKWDEYGEIIPKEDFLVPELQATE-----EKS       | 500 |
| Rat   | MTSIIKLVKFSAGKDEGLCYLLQVDDGYILLDCGWDERFLQVFEELKFFPKISAVLI  | 60  | Rat   | KGSFFKQAKKSYMPFAPAEERIKWDEYGEIIPKEDFLVPELQATE-----EKS       | 500 |
| Worm  | SHDPDLHLGGLPYLVKGLGNCPIYATIPVFKGMQFMYDLYVSHLDVNEFEHYLDDVD  | 120 | Worm  | EPVVKKREEEVEEYVNDVHEMPTCVFEFNKRVESVCEPIEYEGISDGESETKLLA     | 588 |
| Fly   | SHDPDLHLGGLPYLVKGLGNCPIYATIPVFKGMQFMYDLYVSHLDVNEFEHYLDDVD  | 120 | Fly   | EPGIGAEQQAQNGIIVNDVLEKPKTLISQRTIEIKARVYIDYEGRSDDGSIKIKIN    | 554 |
| Human | SHDPDLHLGGLPYLVKGLGNCPIYATIPVFKGMQFMYDLYVSHLDVNEFEHYLDDVD  | 120 | Human | ESGL-----TNGEPMDDQLSDVPTKCVSATESIEIKARVYIDYEGRSDDGSIKIKIN   | 554 |
| Mouse | SHDPDLHLGGLPYLVKGLGNCPIYATIPVFKGMQFMYDLYVSHLDVNEFEHYLDDVD  | 120 | Mouse | ESGL-----TNGEPMDDQLSDVPTKCVSATESIEIKARVYIDYEGRSDDGSIKIKIN   | 554 |
| Rat   | SHDPDLHLGGLPYLVKGLGNCPIYATIPVFKGMQFMYDLYVSHLDVNEFEHYLDDVD  | 120 | Rat   | ESGL-----TNGEPMDDQLSDVPTKCVSATESIEIKARVYIDYEGRSDDGSIKIKIN   | 554 |
| Worm  | TAPEKVEQVYQNTVTKGDD--SGVHTALPAGHMLGGSIRICRVGTGDIYVYVDFNHKK | 179 | Worm  | GILLPQIIVVHGSRDDTRDLVAVFADSGEDTTLKAPAGALVADVASEFTYQVALSDAI  | 648 |
| Fly   | TAPEKVEQVYQNTVTKGDD--SGVHTALPAGHMLGGSIRICRVGTGDIYVYVDFNHKK | 180 | Fly   | QLRPRRVIHCTAGETQVAVRHCQNG---ARVPTPKGRIIDVTSFETHIYQVRLTEGL   | 623 |
| Human | TAPEKVEQVYQNTVTKGDD--SGVHTALPAGHMLGGSIRICRVGTGDIYVYVDFNHKK | 180 | Human | QMKPRLIIVHGPPEASDLAECCRAFGGDKIVYMPKPLHETVDATSETHIYQVRLKDSI  | 614 |
| Mouse | TAPEKVEQVYQNTVTKGDD--SGVHTALPAGHMLGGSIRICRVGTGDIYVYVDFNHKK | 180 | Mouse | QMKPRLIIVHGPPEASDLAECCRAFGGDKIVYMPKPLHETVDATSETHIYQVRLKDSI  | 614 |
| Rat   | TAPEKVEQVYQNTVTKGDD--SGVHTALPAGHMLGGSIRICRVGTGDIYVYVDFNHKK | 180 | Rat   | QMKPRLIIVHGPPEASDLAECCRAFGGDKIVYMPKPLHETVDATSETHIYQVRLKDSI  | 614 |
| Worm  | ERHLNGCSDFNFRPHLLITGAHHISLPQRRKRDDELVTKILLTVRQGDCHVILDTA   | 239 | Worm  | LADIQFKEVSEGNLAWIDARVMEK--EADNMLAVTSNLLDKNREEDVNDQENGAT     | 707 |
| Fly   | ERHLNGCSDFNFRPHLLITGAHHISLPQRRKRDDELVTKILLTVRQGDCHVILDTA   | 240 | Fly   | VSLQFQKQK--DARVANVGLRQVRAEAMVTVVY---VQEGTLLDLETLADDE        | 659 |
| Human | EIHLNGCSLEMLSRPSSLITDSFNATVQPRRQRDELLTNVLETLRGGDGNLVAFTA   | 240 | Human | VSSLPQCKAK--DAELAWIDGVLDVMSRVKVTGVLEEGELK                   | 654 |
| Mouse | EIHLNGCSLEMLSRPSSLITDSFNATVQPRRQRDELLTNVLETLRGGDGNLVAFTA   | 240 | Mouse | VSSLPQCKAK--DAELAWIDGVLDVMSRVKVTGVLEEGELK                   | 654 |
| Rat   | EIHLNGCSLEMLSRPSSLITDSFNATVQPRRQRDELLTNVLETLRGGDGNLVAFTA   | 240 | Rat   | VSSLPQCKAK--DAELAWIDGVLDVMSRVKVTGVLEEGELK                   | 654 |
| Worm  | GRVLELAHLLDQLWNSADAGLSTYNLVMHSHVASVVFQAKSOLEWNEKLFKYDSSAR  | 291 | Worm  | EGEGNAEPMEIGENGSOESLAISESGVEVNGHTNDRSRKTKGIRKGNLIDPLPKRL    | 767 |
| Fly   | GRVLELAHLLDQLWNSADAGLSTYNLVMHSHVASVVFQAKSOLEWNEKLFKYDSSAR  | 291 | Fly   | -----DQDAS-----FQDAS-----VQEGTLLDLETLADDE                   | 680 |
| Human | GRVLELAHLLDQLWNSADAGLSTYNLVMHSHVASVVFQAKSOLEWNEKLFKYDSSAR  | 291 | Human | DDGEDEKQVDPADSSSAMAAQK---AMKSL--FGDE--KELGEEETIPLPELPHPE    | 707 |
| Mouse | GRVLELAHLLDQLWNSADAGLSTYNLVMHSHVASVVFQAKSOLEWNEKLFKYDSSAR  | 291 | Mouse | DDGEDEKQVDPADSSSAMAAQK---AMKSL--FGDE--KELGEEETIPLPELPHPE    | 707 |
| Rat   | GRVLELAHLLDQLWNSADAGLSTYNLVMHSHVASVVFQAKSOLEWNEKLFKYDSSAR  | 291 | Rat   | DDGEDEKQVDPADSSSAMAAQK---AMKSL--FGDE--KELGEEETIPLPELPHPE    | 707 |
| Worm  | YNPFTLKHVTLCHSHOEMLRVR--SPKVLCSQDMESEGRLEFLDWCSDPRNGVILTA  | 351 | Worm  | TIHQAVFVNDPKLSDFKNLLTDKGYKAEFLSGTLLINGGNCISIRNNDTVGFQMEGATK | 827 |
| Fly   | YNPFTLKHVTLCHSHOEMLRVR--SPKVLCSQDMESEGRLEFLDWCSDPRNGVILTA  | 351 | Fly   | IPHNSVLINEHLSDFKQTLMRNNINSEFSGVGLWCSNGTALALRVDAKVMGECISE    | 740 |
| Human | NNPFPQKHLCHLSDSLARVP--SPKVLASQDLECFGRSRLIQWQDQPKNSIILTYR   | 351 | Human | VPHQSVFPMNPRLSDFKQVLLREGIQAEFVGGVLCVQNG--VAVRTTEGRIGLECCLO  | 766 |
| Mouse | NNPFPQKHLCHLSDSLARVP--SPKVLASQDLECFGRSRLIQWQDQPKNSIILTYR   | 351 | Mouse | VPHQSVFPMNPRLSDFKQVLLREGIQAEFVGGVLCVQNG--VAVRTTEGRIGLECCLO  | 766 |
| Rat   | NNPFPQKHLCHLSDSLARVP--SPKVLASQDLECFGRSRLIQWQDQPKNSIILTYR   | 351 | Rat   | VPHQSVFPMNPRLSDFKQVLLREGIQAEFVGGVLCVQNG--VAVRTTEGRIGLECCLO  | 766 |
| Worm  | PASFTLAALKVMAERANDGVLKHEDRLISLVVKKRVALEGEELLEYKRRKAERDAETR | 411 | Worm  | DYKLRRLRYDQFAVL-- 843                                       |     |
| Fly   | TSPGTLARLIDNP-----PGKQIELDVRVRRVLEGALEEVLTQTQEKLNPLIV      | 401 | Fly   | EYKIRRELLYQYAVI-- 756                                       |     |
| Human | TPGTLARLIDNP-----SERKTEELRRVRLKGELEEVLEKELKKAARK           | 401 | Human | DFYRIRDLLEYQYAVI-- 784                                      |     |
| Mouse | TPGTLARLIDNP-----SERKTEELRRVRLKGELEEVLEKELKKAARK           | 401 | Mouse | DFYRIRDLLEYQYAVI-- 782                                      |     |
| Rat   | TPGTLARLIDNP-----SERKTEELRRVRLKGELEEVLEKELKKAARK           | 401 | Rat   | DFYRIRDLLEYQYAVI-- 782                                      |     |
| Worm  | LRMERARRQAQANESDSDS--DDDDIAAPVPRHSEKDFRSPDGENAHTFDIMAKWDNQ | 477 |       |                                                             |     |
| Fly   | -----K--PDVEEESSESEDDI--EM-----SVITGKHDIVVRPEGRH           | 445 |       |                                                             |     |
| Human | LEQS--KE--ADISSDESDEEDIDQP-----SAHKTKHLDMKMGEGSR           | 449 |       |                                                             |     |
| Mouse | LEQS--KE--ADISSDESDEEDIDQP-----SAHKTKHLDMKMGEGSR           | 449 |       |                                                             |     |
| Rat   | LEQS--KE--ADISSDESDEEDIDQP-----SAHKTKHLDMKMGEGSR           | 449 |       |                                                             |     |

Metallo-beta-lactamase domain (Mandel et al., 2006)  
Beta-CASP domain (Mandel et al., 2006)

**cpsf-3 (CPSF-73)**

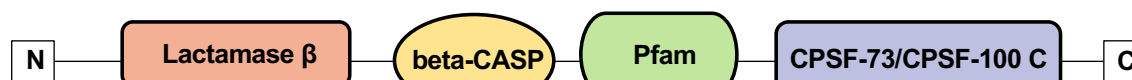

|       |                                                             |     |       |                                                            |     |
|-------|-------------------------------------------------------------|-----|-------|------------------------------------------------------------|-----|
| Worm  | -----MEEGDNDSLCTFLGSGQVGRSCHLELYKGRVMLDCGVHGLHGVDALP        | 53  | Worm  | IIAGYCVBGTAKHLISEPEEITVLSGKELPMRMDVYVFSATIDYQOQSEFIRALKPF  | 412 |
| Human | -----MSAIPAESDQLLIRPLGAGQVGRSCILIEFKGRKIMLDCGHPGLEGDHALP    | 54  | Human | IIAGYCVBGTAKHLISEPEEITVMSGQKPLRMDVYVFSATIDYQOQSEFIRALKPF   | 413 |
| Mouse | -----MSAIPAESDQLLIRPLGAGQVGRSCILIEFKGRKIMLDCGHPGLEGDHALP    | 54  | Mouse | IIAGYCVBGTAKHLISEPEEITVMSGQKPLRMDVYVFSATIDYQOQSEFIRALKPF   | 412 |
| Fly   | MTQATQDARMDEESDQLIRPLGAGQVGRSCILIEFKGRKIMLDCGHPGLEGDHALP    | 60  | Fly   | IIAGYCVBGTAKHLISEPEEITVMSGQKPLRMDVYVFSATIDYQOQSEFIRALKPF   | 418 |
| Worm  | FVDVPEIENIDLLITLHFDLDCGALPWLQKTSFKGRGTFMTHATKAIYRWLLSDYKVS  | 113 | Worm  | HLVLVHGEQNEMLRKAALIREYEDNDEVHIEVHNPNTEAVTNFRKELAKVWGLAD    | 472 |
| Human | YIDLIDPAEIDLLITLHFDLDCGALPWLQKTSFKGRGTFMTHATKAIYRWLLSDYKVS  | 114 | Human | HLVLVHGEQNEMLRKAALIREYEDNDEVHIEVHNPNTEAVTNFRKELAKVWGLAD    | 472 |
| Mouse | YIDLIDPAEIDLLITLHFDLDCGALPWLQKTSFKGRGTFMTHATKAIYRWLLSDYKVS  | 114 | Mouse | HLVLVHGEQNEMLRKAALIREYEDNDEVHIEVHNPNTEAVTNFRKELAKVWGLAD    | 472 |
| Rat   | YIDLIDPAEIDLLITLHFDLDCGALPWLQKTSFKGRGTFMTHATKAIYRWLLSDYKVS  | 114 | Rat   | HLVLVHGEQNEMLRKAALIREYEDNDEVHIEVHNPNTEAVTNFRKELAKVWGLAD    | 472 |
| Fly   | YVDLIDAEIDLLITLHFDLDCGALPWLQKTSFKGRGTFMTHATKAIYRWLLSDYKVS   | 120 | Fly   | HLVLVHGEQNEMLRKAALIREYEDNDEVHIEVHNPNTEAVTNFRKELAKVWGLAD    | 478 |
| Worm  | KYGGPRNQLVTEDELEKSMKAIETIDFREQVENVIRFPWYVAGVILGACQFMIETAGV  | 173 | Worm  | RVEPNNETISGLVKNRNFYSIMVPEELGSLVSLRISLSELRMSVHYSGSKLLIFNLQ  | 532 |
| Human | NISA--DMMLVTEDELEKSMKAIETIDFREQVENVIRFPWYVAGVILGACQFMIETAGV | 172 | Human | KKPEQQRVSGILVKNRNFYHLSPCDLSNVTDLAMSTVQQAIPYTGFFLLYQYQK     | 532 |
| Mouse | NISA--DMMLVTEDELEKSMKAIETIDFREQVENVIRFPWYVAGVILGACQFMIETAGV | 172 | Mouse | KKPEQQRVSGILVKNRNFYHLSPCDLSNVTDLAMSTVQQAIPYTGFFLLYQYQK     | 532 |
| Fly   | NIST--EQMLVTEDELEKSMKAIETIDFREQVENVIRFPWYVAGVILGACQFMIETAGV | 178 | Fly   | KNEVSGKLSGLVKNRNFYHLSPCDLSNVTDLAMSTVQQAIPYTGFFLLYQYQK      | 538 |
| Worm  | RVLVTDQFSQDRHLMAAEIPNPKPDLIIESTYVTHHEKREERARFCMTVHDIVNR     | 233 | Worm  | IMDDACLINQIKLKEISKGSVQTAITVQKQVNTVYGNHVVVWVMSNPNVYDADS     | 592 |
| Human | KLLYTDQFSQDRHLMAAEIPNPKPDLIIESTYVTHHEKREERARFCMTVHDIVNR     | 232 | Human | LRGDEVELEIQE-----KPAKVF---KNTITVQEGMVLKLANPSNDYADT         | 579 |
| Mouse | KLLYTDQFSQDRHLMAAEIPNPKPDLIIESTYVTHHEKREERARFCMTVHDIVNR     | 232 | Mouse | LRGDEVELEIQE-----KPAKVF---KNTITVQEGMVLKLANPSNDYADT         | 579 |
| Rat   | KLLYTDQFSQDRHLMAAEIPNPKPDLIIESTYVTHHEKREERARFCMTVHDIVNR     | 232 | Rat   | LRGDEVELEIQE-----KPAKVF---KNTITVQEGMVLKLANPSNDYADT         | 579 |
| Fly   | KILYTDQFSQDRHLMAAEIPNPKPDLIIESTYVTHHEKREERARFCMTVHDIVNR     | 238 | Fly   | IGAGCEV--LEA-----EKRLVY---GCIELVTEQKILVMEQATVHNVYADA       | 584 |
| Worm  | SGRCLIPVAFAGQAEQLLIDVWQHPHLDIPYIYASSLAKKCMVYQYVYVANNNDK     | 293 | Worm  | VVAALHQAQNPVDPKYL---SNSSFPQNTAIEGMVKHICGDDVYSIMSERGLLAQF   | 648 |
| Human | SGRCLIPVAFAGQAEQLLIDVWQHPHLDIPYIYASSLAKKCMVYQYVYVANNNDK     | 292 | Human | VTVVILEVQSNPKIRKGAQVQVSKLEMHVYSKRLLEMLDQIFGECVSV--KDDSVLST | 638 |
| Mouse | SGRCLIPVAFAGQAEQLLIDVWQHPHLDIPYIYASSLAKKCMVYQYVYVANNNDK     | 292 | Mouse | VTVVILEVQSNPKIRKGAQVQVSKLEMHVYSKRLLEMLDQIFGECVSV--KDDSVLST | 638 |
| Fly   | SGRCLIPVAFAGQAEQLLIDVWQHPHLDIPYIYASSLAKKCMVYQYVYVANNNDK     | 298 | Fly   | VLAICMQSLGGTNGKATQK---KESDRPRELIEITLQDFGDCNPKMFGDLP        | 642 |
| Worm  | IRKQIANNPFFVKHISNLKSMDFHFDIGPSVVMASPGMIQNGLSRELFSWCTDKRNGV  | 353 | Worm  | EEDGRRLVGESSDQFVMMGDDPMDPTSHLLQNLTEKMRQVITTTNEVIDMEC       | 707 |
| Human | IRKQIANNPFFVKHISNLKSMDFHFDIGPSVVMASPGMIQNGLSRELFSWCTDKRNGV  | 352 | Human | V--DGKTANINLETR--TVECEGSEDDLESREVELAARQYALVTPH-----        | 684 |
| Mouse | IRKQIANNPFFVKHISNLKSMDFHFDIGPSVVMASPGMIQNGLSRELFSWCTDKRNGV  | 352 | Mouse | V--DGKTANINLETR--AVECEGSEDDLESREVELAARQYALVTPH-----        | 684 |
| Rat   | IRKQIANNPFFVKHISNLKSMDFHFDIGPSVVMASPGMIQNGLSRELFSWCTDKRNGV  | 352 | Rat   | V--DGKTANINLETR--AVECEGSEDDLESREVELAARQYALVTPH-----        | 684 |
| Fly   | IRKQIANNPFFVKHISNLKSMDFHFDIGPSVVMASPGMIQNGLSRELFSWCTDKRNGV  | 358 | Fly   | V--SGKRAINLETR--AISCADDV---LRQMLTTVQKHLQTLVYAL-----        | 685 |

Metallo-beta-lactamase domain (Mandel et al., 2006)      Ligands to Zn1 (Mandel et al., 2006)  
Beta-CASP domain (Mandel et al., 2006)      Ligands to Zn2 (Mandel et al., 2006)  
Bridging ligand to Zinc atoms (Mandel et al., 2006)      General acid for catalysis (Mandel et al., 2006)



CPSF Complex

pfs-2 (WDR33)

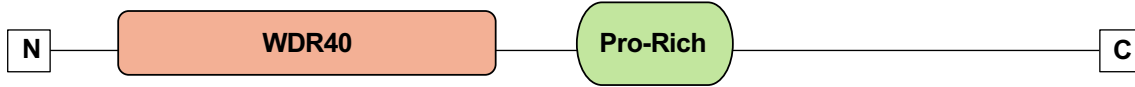

| Species | Protein                                                         | Accession | Start | End                                                             | Species | Protein | Accession | Start | End |
|---------|-----------------------------------------------------------------|-----------|-------|-----------------------------------------------------------------|---------|---------|-----------|-------|-----|
| Worm    | MTAVSNLAFMNMGGMRGNMNPVTLTIQPS-TSSNMQRPMNN-...HHPH-...           | 51        | Worm  | -----GGNGGWORPPQGSYGGQQPPQ-...SYGGQGL-...QGSYAS-...             | 673     |         |           |       |     |
| Fly     | -----MVSQPPQLLTPALSAATMFTSLPPNMGQHYRHHPHGSM-...                 | 44        | Fly   | DRDRERARERERDQSGRPNWASNAWNSNG-...NFGNGN-...GSMGNS-...NGAESF-... | 760     |         |           |       |     |
| Human   | -----MATEIGS-PPRFHMPRFQHQAP-...                                 | 22        | Human | PGQMORHPGPH-GPLGPGQPGPGQSSGPGQGHMGPGQPGPGQGHIGPGQPGPGQHLGFP-... | 732     |         |           |       |     |
| Mouse   | -----MATEIGS-PPRFHMPRFQHQAP-...                                 | 22        | Mouse | PGQMORHPGPH-GPLGPGQPGPGQSSGPGQGHMGPGQPGPGQGHIGPGQPGPGQHLGFP-... | 731     |         |           |       |     |
| Rat     | -----MATEIGS-PPRFHMPRFQHQAP-...                                 | 22        | Rat   | PGQMORHPGPH-GPLGPGQPGPGQSSGPGQGHMGPGQPGPGQGHIGPGQPGPGQHLGFP-... | 731     |         |           |       |     |
| Worm    | -----NRFQREHVPDMVGGDGRRLRKNVANVRHVYDVTVLNHCENRLWQ-...           | 99        | Worm  | -----QQ-PPRQIQHIP-...SDIDYRTAPSSNGSTGCDVDRMTVMP-...             | 712     |         |           |       |     |
| Fly     | KHGYNQKFPFPGQRFPCMSQD--DFDGKRLRKS--VNRKTYDYNASIIKALENRYLQ-...   | 100       | Fly   | -----NDRDRGGGQRNRRIINNSGPNCGGGGGGGG-...GGGNNRGNRNNRY-...        | 807     |         |           |       |     |
| Human   | -----RLFYKRFDFQQQAMQL--TFDGKMRKA--VNRKTYDYNASVIKYLENRYQ-...     | 73        | Human | GPPTGQMGQPGPRGMQ--GPPHPIQG--G-PGSGIQGGVSGPLMGLNPRGMQGP-...      | 787     |         |           |       |     |
| Mouse   | -----RLFYKRFDFQQQAMQL--TFDGKMRKA--VNRKTYDYNASVIKYLENRYQ-...     | 73        | Mouse | GPPTGQMGQPGPRGMQ--GPPHPIQG--G-PASQIQG--...PLMGLNPRGMQGP-...     | 781     |         |           |       |     |
| Rat     | -----RLFYKRFDFQQQAMQL--TFDGKMRKA--VNRKTYDYNASVIKYLENRYQ-...     | 73        | Rat   | GPPTGQMGQPGPRGMQ--GPPHPIQG--G-PTSQIQG--...PLMGLNPRGMQGP-...     | 781     |         |           |       |     |
| Worm    | YKQ-RILQPDILYQAVPADSTTPVDCLIKFIRIRANMKVKCPVYSCWSPGK-...         | 158       | Worm  | -----NQPP-...                                                   | 718     |         |           |       |     |
| Fly     | RDYDRDLAQDSYVHPLMPSAYLNPNSNAVTRFVKATNKRKCFPLTAVTEGRR-...        | 160       | Fly   | PGPRENQGPAPQGMIMGHPQEMRGPPLGGLLHGHPQEMRGPQETRMGQPPPGQSMGL-...   | 807     |         |           |       |     |
| Human   | RQDRDMRAIQPDAGYVNDLVPFVIGMLANPNMAVTRFVRSSTNKVKCPVYVVRVTEGRR-... | 133       | Human | PGPRENQGPAPQGMIMGHPQEMRGPPLGGLLHGHPQEMRGPQETRMGQPPPGQSMGL-...   | 847     |         |           |       |     |
| Mouse   | RQDRDMRAIQPDAGYVNDLVPFVIGMLANPNMAVTRFVRSSTNKVKCPVYVVRVTEGRR-... | 133       | Mouse | PGPRENQGPAPQGMIMGHPQEMRGPPLGGLLHGHPQEMRGPQETRMGQPPPGQSMGL-...   | 841     |         |           |       |     |
| Rat     | RQDRDMRAIQPDAGYVNDLVPFVIGMLANPNMAVTRFVRSSTNKVKCPVYVVRVTEGRR-... | 133       | Rat   | PGPRENQGPAPQGMIMGHPQEMRGPPLGGLLHGHPQEMRGPQETRMGQPPPGQSMGL-...   | 841     |         |           |       |     |
| Worm    | LTGCGTGFELMNGTAFNFETLQAHDSAIRLKWASNEQWLLSAGQVYKYNQPMN-...       | 218       | Worm  | EPEHWRGPPVSHQOQSQO--HPPPI-NMQ-...RMDPRDRPRLSG-...RSD-...        | 762     |         |           |       |     |
| Fly     | LVGASGSEFELMNGTAFNFETLQAHDSVIRVMVSHSNDVMVGGVYKYNQSMN-...        | 220       | Fly   | FPQELRGSFGSQGQPGQSLGPPPGQMGQPPPGQGNPARGPHSGQIPFPQOQK-...        | 807     |         |           |       |     |
| Human   | LVGASGSEFELMNGTAFNFETLQAHDSVIRVMVSHSNDVMVGGVYKYNQSMN-...        | 193       | Human | FPQELRGSFGSQGQPGQSLGPPPGQMGQPPPGQGNPARGPHSGQIPFPQOQK-...        | 907     |         |           |       |     |
| Mouse   | LVGASGSEFELMNGTAFNFETLQAHDSVIRVMVSHSNDVMVGGVYKYNQSMN-...        | 193       | Mouse | FPQELRGSFGSQGQPGQSLGPPPGQMGQPPPGQGNPARGPHSGQIPFPQOQK-...        | 901     |         |           |       |     |
| Rat     | LVGASGSEFELMNGTAFNFETLQAHDSVIRVMVSHSNDVMVGGVYKYNQSMN-...        | 193       | Rat   | FPQELRGSFGSQGQPGQSLGPPPGQMGQPPPGQGNPARGPHSGQIPFPQOQK-...        | 901     |         |           |       |     |
| Worm    | NAMFSAHNDGAIIRGLAFATDVKFAASDDGTRVWQFARVTEERVLRSHGAEVRCID-...    | 278       | Worm  | QL-...SPSGPPQQQSSAQGGKQWMPFAGEAGNQNGYAGHRGGV-...                | 809     |         |           |       |     |
| Fly     | NVKMFOAHL-EAIRGASFPSTDSKVFSGSDDTLRVWDFRMRQERVLRHGADVKCVHM-...   | 279       | Fly   | PLLDGGRAPFNEQSGTGPPLIP-GLGQ--GAQRIPPLNFGQGP-...-...             | 953     |         |           |       |     |
| Human   | NVKMFOAHL-EAIRGASFPSTDNKFAFCSDDGTVRWFDFRMRQERVLRHGADVKCVHM-...  | 252       | Human | PLLDGGRAPFNEQSGTGPPLIP-GLGQ--GAQRIPPLNFGQGP-...-...             | 947     |         |           |       |     |
| Mouse   | NVKMFOAHL-EAIRGASFPSTDNKFAFCSDDGTVRWFDFRMRQERVLRHGADVKCVHM-...  | 252       | Mouse | PLLDGGRAPFNEQSGTGPPLIP-GLGQ--GAQRIPPLNFGQGP-...-...             | 947     |         |           |       |     |
| Rat     | NVKMFOAHL-EAIRGASFPSTDNKFAFCSDDGTVRWFDFRMRQERVLRHGADVKCVHM-...  | 252       | Rat   | PLLDGGRAPFNEQSGTGPPLIP-GLGQ--GAQRIPPLNFGQGP-...-...             | 947     |         |           |       |     |
| Worm    | HPTKGLIATGSRDTPQVFKWDPKSGSLATLQHEKSSVMVAEKNKGNWLLTGRDRHLV-...   | 338       | Worm  | GGRGRGQOPY-...                                                  | 820     |         |           |       |     |
| Fly     | HPQGMIVSGSKDQOPIKWDPKSGSIALALALHAHKSVMVLDKWNNDGNWLLTASRDHL-...  | 339       | Fly   | PNKGDGSGPPNHHMGPMSERRHEQSGGPEHGERGPFPGQDQCRGPPDRRGGHPDFPDD-...  | 1013    |         |           |       |     |
| Human   | HPTKGLVSGSKDQOPIKWDPKTQSLATLHAHKNVMEVKLNLNGWLLTASRDHL-...       | 312       | Human | PNKGDTRGPPNHHMGPMSERRHEQSGGPEHGERGPFPGQDQCRGPPDRRGGHPDFPDD-...  | 1007    |         |           |       |     |
| Mouse   | HPTKGLVSGSKDQOPIKWDPKTQSLATLHAHKNVMEVKLNLNGWLLTASRDHL-...       | 312       | Mouse | PNKGDTRGPPNHHMGPMSERRHEQSGGPEHGERGPFPGQDQCRGPPDRRGGHPDFPDD-...  | 1007    |         |           |       |     |
| Rat     | HPTKGLVSGSKDQOPIKWDPKTQSLATLHAHKNVMEVKLNLNGWLLTASRDHL-...       | 312       | Rat   | PNKGDTRGPPNHHMGPMSERRHEQSGGPEHGERGPFPGQDQCRGPPDRRGGHPDFPDD-...  | 1007    |         |           |       |     |
| Worm    | KMYDIRMK-EMRYRAHKKEVISLAWHPIHEGLFVSGGDSGIYVWVDEKEREIGLLE-...    | 397       | Worm  | SRPDDFHPDKRFGRHLREFEGRGGPLPQEKWRGGGPPFPDHPRENEGDGRGAAR-...      | 1073    |         |           |       |     |
| Fly     | KLFDIRNLKEELQVFRGKKEATAVAVHVEHGLFASGSDGSLFVHWVGEVEGVMEM-...     | 372       | Fly   | SRPDDFHPDKRFGRHLREFEGRGGPLPQEKWRGGGPPFPDHPRENEGDGRGAAR-...      | 1066    |         |           |       |     |
| Human   | KLFDIRNLKEELQVFRGKKEATAVAVHVEHGLFASGSDGSLFVHWVGEVEGVMEM-...     | 372       | Human | SRPDDFHPDKRFGRHLREFEGRGGPLPQEKWRGGGPPFPDHPRENEGDGRGAAR-...      | 1067    |         |           |       |     |
| Mouse   | KLFDIRNLKEELQVFRGKKEATAVAVHVEHGLFASGSDGSLFVHWVGEVEGVMEM-...     | 372       | Mouse | SRPDDFHPDKRFGRHLREFEGRGGPLPQEKWRGGGPPFPDHPRENEGDGRGAAR-...      | 1067    |         |           |       |     |
| Rat     | KLFDIRNLKEELQVFRGKKEATAVAVHVEHGLFASGSDGSLFVHWVGEVEGVMEM-...     | 372       | Rat   | SRPDDFHPDKRFGRHLREFEGRGGPLPQEKWRGGGPPFPDHPRENEGDGRGAAR-...      | 1067    |         |           |       |     |
| Worm    | AHDQIWSMKWHLGLHILATGSDNDNTKFWARNRPGDVTEDIFGLSNTNMG-HDKERE-...   | 456       | Worm  | PGWEGRRPDERFRPDPRFRGRREESFRGAPPRIHGRAPPRGRDNGFPDDEGPE-...       | 1133    |         |           |       |     |
| Fly     | AHDQIWSLAWHLGLHILCSDNDHTSKFWTRNRPGLMDRKYNLTLPASLALDECEY-...     | 459       | Fly   | PGWEGRRPDERFRPDPRFRGRREESFRGAPPRIHGRAPPRGRDNGFPDDEGPE-...       | 1126    |         |           |       |     |
| Human   | AHEGMIWSLAWHLGLHILCSDNDHTSKFWTRNRPGLMDRKYNLTLPGHSE--DGYEY-...   | 430       | Human | PGWEGRRPDERFRPDPRFRGRREESFRGAPPRIHGRAPPRGRDNGFPDDEGPE-...       | 1126    |         |           |       |     |
| Mouse   | AHEGMIWSLAWHLGLHILCSDNDHTSKFWTRNRPGLMDRKYNLTLPGHSE--DGYEY-...   | 430       | Mouse | PGWEGRRPDERFRPDPRFRGRREESFRGAPPRIHGRAPPRGRDNGFPDDEGPE-...       | 1126    |         |           |       |     |
| Rat     | AHEGMIWSLAWHLGLHILCSDNDHTSKFWTRNRPGLMDRKYNLTLPGHSE--DGYEY-...   | 430       | Rat   | PGWEGRRPDERFRPDPRFRGRREESFRGAPPRIHGRAPPRGRDNGFPDDEGPE-...       | 1127    |         |           |       |     |
| Worm    | PRMAPPKSIETQETRYDPTFIPGMLDEHLYEQLNRDHNMM--TDDSTLLVDP-DLTRQ-...  | 513       | Worm  | -----                                                           | 820     |         |           |       |     |
| Fly     | -----DALIFQMGPEORVEETESL-...-TADGKIPSLDLDPS-...                 | 494       | Fly   | -----                                                           | 807     |         |           |       |     |
| Human   | DDL-----EPNSLAVIPGMGIPQQLKAMEQEQMGKDESSEIEMTIPGLDWGME-...       | 479       | Human | -----                                                           | 820     |         |           |       |     |
| Mouse   | DDL-----EPNSLAVIPGMGIPQQLKAMEQEQMGKDESSEIEMTIPGLDWGME-...       | 479       | Mouse | -----                                                           | 807     |         |           |       |     |
| Rat     | DDL-----EPNSLAVIPGMGIPQQLKAMEQEQMGKDESSEIEMTIPGLDWGME-...       | 479       | Rat   | -----                                                           | 820     |         |           |       |     |
| Worm    | NFAPMIGAKRLLKQPKAKAQRQFERMWNNSKIGGASGD--FTTMGGGLREDAGEE-...     | 569       | Worm  | -----                                                           | 820     |         |           |       |     |
| Fly     | KAIN--DRDREKVPYSKIPRNFQVNWAGPRADDPSV--L-SHEELAAEAEDKDTN-...     | 548       | Fly   | -----                                                           | 807     |         |           |       |     |
| Human   | EVMQDKQKVPQKVPYAKIPAQFQAWMKNKVPAPAPNEVLDNRKEDIKLEEKKTQA-...     | 539       | Human | -----                                                           | 820     |         |           |       |     |
| Mouse   | EVMQDKQKVPQKVPYAKIPAQFQAWMKNKVPAPAPNEVLDNRKEDIKLEEKKTQA-...     | 539       | Mouse | -----                                                           | 807     |         |           |       |     |
| Rat     | EVMQDKQKVPQKVPYAKIPAQFQAWMKNKVPAPAPNEVLDNRKEDIKLEEKKTQA-...     | 539       | Rat   | -----                                                           | 820     |         |           |       |     |
| Worm    | -----AQFGSKSFLGPTTGGSLGPP-...                                   | 591       | Worm  | -----                                                           | 820     |         |           |       |     |
| Fly     | GLNHQIASENTMGLIAGMLGLDPTIVGLVYVNRIRVHDSRLMAIIRQAGEFLNK-...      | 608       | Fly   | -----                                                           | 807     |         |           |       |     |
| Human   | EIEQ-----EMA-----TLQYTNQLL-EQKIERLAQKQV-QIOPPPSSGTPLLG-...      | 585       | Human | -----                                                           | 1252    |         |           |       |     |
| Mouse   | EIEQ-----EMA-----TLQYTNQLL-EQKIERLAQKQV-QIOPPPSSGTPLLG-...      | 585       | Mouse | -----                                                           | 1246    |         |           |       |     |
| Rat     | EIEQ-----EMA-----TLQYTNQLL-EQKIERLAQKQV-QIOPPPSSGTPLLG-...      | 585       | Rat   | -----                                                           | 1247    |         |           |       |     |
| Worm    | -----RHOQPPMSG-----PGQYGPGRM-...                                | 635       | Worm  | -----                                                           | 820     |         |           |       |     |
| Fly     | MOCKFPQLQSLAAKQAPNTEFVEPPLEQRD-...-DREREG-...                   | 706       | Fly   | -----                                                           | 807     |         |           |       |     |
| Human   | -----PQPPHOGGGGPGQMGQPGQPGQGLPRPDHMG-...                        | 673       | Human | -----                                                           | 1336    |         |           |       |     |
| Mouse   | -----PQPPHOGGGGPGQMGQPGQPGQGLPRPDHMG-...                        | 672       | Mouse | -----                                                           | 1330    |         |           |       |     |
| Rat     | -----PQPPHOGGGGPGQMGQPGQPGQGLPRPDHMG-...                        | 672       | Rat   | -----                                                           | 1331    |         |           |       |     |

Legend:  
  N-terminal domain, contacts CPSF-160 and CPSF-30 (Clerici et al., 2017)  
  WD40 repeats, contact U3 and A6 of PAS (Clerici et al., 2017)



# CstF Complex

## *suf-1* (CstF77)

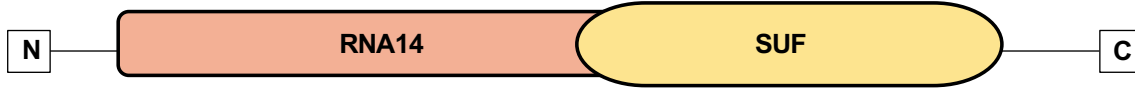

|       |                                                                                             |     |       |                                                                                             |     |
|-------|---------------------------------------------------------------------------------------------|-----|-------|---------------------------------------------------------------------------------------------|-----|
| Worm  | -----MSGLSRNPFERRIETNFVDVDAWNLRLREHQSRPIDQERDFYESLVR                                        | 47  | Worm  | YNCKRDEVAIRVFKLGLKYYENEPEFGLAYADFLSNLNDNTRVFERILTSSKLPAD                                    | 467 |
| Fly   | MSSARDLIKVDIEWGMLRVAQQVLELRFYDIESWSVMIREACTRPIHEVRSLSVESLVN                                 | 60  | Fly   | YYCSKDKBIAFRIFELGLKRFGGSPYVMCYIDVLSHLNEDNTRVLFERVLSSGGLSPH                                  | 480 |
| Human | -----AAEYVPEVKVKAEEKLEENFYDLDAWSILIREAQNOPIDKARKTYERLVA                                     | 50  | Human | YYCSKDKSVAFKIFELGLKRYGDIPEVLYAIDVLSHLNEDNTRVLFERVLSSGGLPPE                                  | 470 |
| Rat   | ---MSGDAAEQAAEYVPEVKVKAEEKLEENFYDLDAWSILIREAQNOPIDKARKTYERLVA                               | 59  | Rat   | YYCSKDKSVAFKIFELGLKRYGDIPEVLYAIDVLSHLNEDNTRVLFERVLSSGGLPPE                                  | 479 |
| Mouse | ---GGAAEQAAEYVPEVKVKAEEKLEENFYDLDAWSILIREAQNOPIDKARKTYERLVA                                 | 57  | Mouse | YYCSKDKSVAFKIFELGLKRYGDIPEVLYAIDVLSHLNEDNTRVLFERVLSSGGLPPE                                  | 477 |
|       | : : : * * * * * : * * * * * : * * * * * : * * * * * : * * * * *                             |     |       | * * * * * : * * * * * : * * * * * : * * * * * : * * * * * : * * * * *                       |     |
| Worm  | QFPNSGRYKWAYIEHELRSKNFENVEKLFSCRIVSVLNIDLKWCYIHYVPETKQGRDQYR                                | 107 | Worm  | KSIRIWRDRFLDFESCVDGLASILKVEKRRRTAYEEAQDQTMNHSMLVIDRYKFMDLMPG                                | 527 |
| Fly   | VFPTTARYWKLYIEMEMBSRYRVEKLFQRCLVKILNIDLKWLTYVKTSGLSLTHK                                     | 120 | Fly   | KSVEVNRFLFESNIGLSSIVKVERRRSAVFENLKEYE-GKETAQLVDRYKFLDLYPC                                   | 539 |
| Human | QFPSSGRFWKLYIEAEIKAKNYDKVEKLFQRCLMKVLHIDLKWCYLSYVRETKGKLPYSYK                               | 110 | Human | KSGETIWARFLAFESNIGLSSILKVEKRRPTAFR--EYEE-GKETALLVDRYKFMDLYPC                                | 527 |
| Rat   | QFPSSGRFWKLYIEAEIKAKNYDKVEKLFQRCLMKVLHIDLKWCYLSYVRETKGKLPYSYK                               | 119 | Rat   | KSGETIWARFLAFESNIGLSSILKVEKRRPTAFR--EYEE-GKETALLVDRYKFMDLYPC                                | 536 |
| Mouse | QFPSSGRFWKLYIEAEIKAKNYDKVEKLFQRCLMKVLHIDLKWCYLSYVRETKGKLPYSYK                               | 117 | Mouse | KSGETIWARFLAFESNIGLSSILKVEKRRPTAFR--EYEE-GKETALLVDRYKFMDLYPC                                | 534 |
|       | ** : * * * * * * * * * * : : : * * * * * * * * * * : * * * * * : * * * * * : * * * * *      |     |       | ** : * * * * * * * * * * : : : * * * * * * * * * * : : : * * * * * : * * * * * * * * * *    |     |
| Worm  | EEMAKAVDFALEKVMQVAYSIFTEYIAFLKRVAVQVAENQRITAVRKIYQKALATP                                    | 167 | Worm  | SGEQLKLCYGNALKTESI--ACPSFVSGKNVPTHGQQAASAINGAGGHADVARYGFPF                                  | 585 |
| Fly   | EKMAQAVDFALEKICMDLHFSFIQWDYIVFLRGEVAVGNVAENQKITAVRRVYQKAVWTP                                | 180 | Fly   | TSTELKSGIYAENVGIIILNKVQGA--QS-----QNTGEV-ETDSEATPPLPR                                       | 584 |
| Human | EKMAQAVDFALDKIGMEIMSYQIWDYINFLKGEVAVGSAENQRITAVRRVYQKAVWTP                                  | 170 | Human | SASELKALGYKDVSRAKLAAIIFPPVVPVAP-----SIVPVL-KDEVDRKPEYPK                                     | 574 |
| Rat   | EKMAQAVDFALDKIGMEIMSYQIWDYINFLKGEVAVGSAENQRITAVRRVYQKAVWTP                                  | 179 | Rat   | SASELKALGYKDVSRAKLAAIIFPPVVPVAP-----SIVPVL-KDEVDRKPEYPK                                     | 583 |
| Mouse | EKMAQAVDFALDKIGMEIMSYQIWDYINFLKGEVAVGSAENQRITAVRRVYQKAVWTP                                  | 177 | Mouse | SASELKALGYKDVSRAKLAAIIFPPVVPVAP-----SIVPVL-KDEVDRKPEYPK                                     | 581 |
|       | * : * * * * * * * * * * : : * * * * * * * * * * : * * * * * * * * * * : * * * * * * * * * * |     |       | * : * * * * * * * * * * : : * * * * * * * * * * : * * * * * * * * * * : * * * * * * * * * * |     |
| Worm  | MHNLELIWVDYCYEKAINITLAEKLIARKEVQNRARVEKLDQMTGRGLNRQAVSVPF                                   | 227 | Worm  | PDISQMFKPRVNTASFPVPPGPPQVAHMLSLPPTFCIGPFINVELLGNMI                                          | 645 |
| Fly   | IVGIEQLWQYIAFEQININPISSEKMSLERSKDYMNARRVAKEYHTKGLNRNLPVAVP                                  | 240 | Fly   | PDFSQMIFKPRPCAHGAPLAGGVFPQPALAALCATLPPNSFRGPFVVELLFDIF                                      | 644 |
| Human | MINIEQLWRDYNKYEEGINIHLAKKMIEDRSRDMNARRVAKEYETVMKGLDRNAPSVPF                                 | 230 | Human | PDTQQMIFPQPRHLAPPLGHPVPGGVFPVPAVVMKLLPPIPCQGFVQVDELMEIF                                     | 634 |
| Rat   | MINIEQLWRDYNKYEEGINIHLAKKMIEDRSRDMNARRVAKEYETVMKGLDRNAPSVPF                                 | 239 | Rat   | PDTQQMIFPQPRHLAPPLGHPVPGGVFPVPAVVMKLLPPIPCQGFVQVDELMEIF                                     | 643 |
| Mouse | MINIEQLWRDYNKYEEGINIHLAKKMIEDRSRDMNARRVAKEYETVMKGLDRNAPSVPF                                 | 237 | Mouse | PDTQQMIFPQPRHLAPPLGHPVPGGVFPVPAVVMKLLPPIPCQGFVQVDELMEIF                                     | 641 |
|       | : : * * * * * * * * * * : * * * * * * * * * * : * * * * * * * * * * : * * * * * * * * * *   |     |       | ** : * * * * * * * * * * : * * * * * * * * * * : * * * * * * * * * * : * * * * * * * * * *  |     |
| Worm  | KGTATEFKQVLEWKNLIWETKINPLQTEYEQHARRVYVTEQSLCLCYGYPDIWYBAAM                                  | 287 | Worm  | NNMOLFNVSYPKSEDNMLGFMLEQDKKDMVQLLATTSDPSAVVRS-SALS--DLKRRK                                  | 702 |
| Fly   | TLTKEEVKQVLEWKRNIETEKSNLRTEDQLITKRVMFATQCLLVLHHPAVVHQASG                                    | 300 | Fly   | MRLNLPDSAPQWCDNELSKFDLAKSVHIV-DP-STYTCVQHSVAVPDRRRLLPG                                      | 702 |
| Human | QNTPOEAQQVDMWKKYIQWKSNNLRTEDQLITKRVMFAYEQCLLVLGHHPDIWYEAAG                                  | 290 | Human | RRCKIPMTVEAVRITGG--APELA-----V-EG---NGPVES-NAVITKAVKRPNE                                    | 680 |
| Rat   | QNTPOEAQQVDMWKKYIQWKSNNLRTEDQLITKRVMFAYEQCLLVLGHHPDIWYEAAG                                  | 299 | Rat   | RRCKIPMTVEAVRITGG--APELA-----V-EG---NGPVES-NAVITKAVKRPNE                                    | 689 |
| Mouse | QNTPOEAQQVDMWKKYIQWKSNNLRTEDQLITKRVMFAYEQCLLVLGHHPDIWYEAAG                                  | 297 | Mouse | RRCKIPMTVEAVRITGG--APELA-----V-EG---NGPVES-NAVITKAVKRPNE                                    | 687 |
|       | * : * * * * * * * * * * : * * * * * * * * * * : * * * * * * * * * * : * * * * * * * * * *   |     |       | . : * * * * * : * * * * * : * * * * * : * * * * * : * * * * * : * * * * *                   |     |
| Worm  | FLQEAHTLDEKGDVMAQVLEKLETISLYERAITGLMKESKLLFYAYADPQEEHQFEAV                                  | 347 | Worm  | DSDEDEYSHLGAIVIGSLGSRDAYKRRMKNKNE--- 735                                                    |     |
| Fly   | FLDTSARVLETKEGDVAQAKIFADECANILERSINGVLRNLLFYAYADFEGRKLYEKV                                  | 360 | Fly   | GDSDEDE---LQTAVP--PSHDIYRLQLKRFKSN 733                                                      |     |
| Human | YLEQSSKLLAERGMNNAKLFSDAANIYERAI STLKKNMLLYFAYADYEESRMKYEKV                                  | 350 | Human | DSDEDEE---KGAVVP--PVHDIYRARQQRIR--- 708                                                     |     |
| Rat   | YLEQSSKLLAERGMNNAKLFSDAANIYERAI STLKKNMLLYFAYADYEESRMKYEKV                                  | 359 | Rat   | DSDEDEE---KGAVVP--PVHDIYRARQQRIR--- 717                                                     |     |
| Mouse | YLEQSSKLLAERGMNNAKLFSDAANIYERAI STLKKNMLLYFAYADYEESRMKYEKV                                  | 357 | Mouse | DSDEDEE---KGAVVP--PVHDIYRARQQRIR--- 715                                                     |     |
|       | : * : * * * * * * * * * * : * * * * * * * * * * : * * * * * * * * * * : * * * * * * * * * * |     |       | . * : * * * * * : * * * * * : * * * * * : * * * * * : * * * * *                             |     |
| Worm  | RNIYDRLLGIEHINPLFYIQLMRFIRRSEGNARLVFKRAREDRRTGYQVFAAALLP                                    | 407 |       |                                                                                             |     |
| Fly   | RTVFNKLLQLPDIIDPLFYVQIMKFAARAEIKSARSIKFKAREDRSRHIFVAALMH                                    | 420 |       |                                                                                             |     |
| Human | HSIYNRLAIEDIDPLFYIYQIMKFAARAEIKSGRMIFKFKAREDRTRHHVYVTAALMH                                  | 410 |       |                                                                                             |     |
| Rat   | HSIYNRLAIEDIDPLFYIYQIMKFAARAEIKSGRMIFKFKAREDRTRHHVYVTAALMH                                  | 419 |       |                                                                                             |     |
| Mouse | HSIYNRLAIEDIDPLFYIYQIMKFAARAEIKSGRMIFKFKAREDRTRHHVYVTAALMH                                  | 417 |       |                                                                                             |     |
|       | : * * * * * * * * * * : * * * * * * * * * * : * * * * * * * * * * : * * * * * * * * * *     |     |       |                                                                                             |     |

Proline-rich segment that facilitates interactions with CstF-64 and CstF-55 (Bai et al., 2007)

HAT-N Domain (Bai et al., 2007)

HAT-C Domain that interacts with CPSF-160 (Bai et al., 2007)



CFin Complex

*cfim-1* (CFim25)

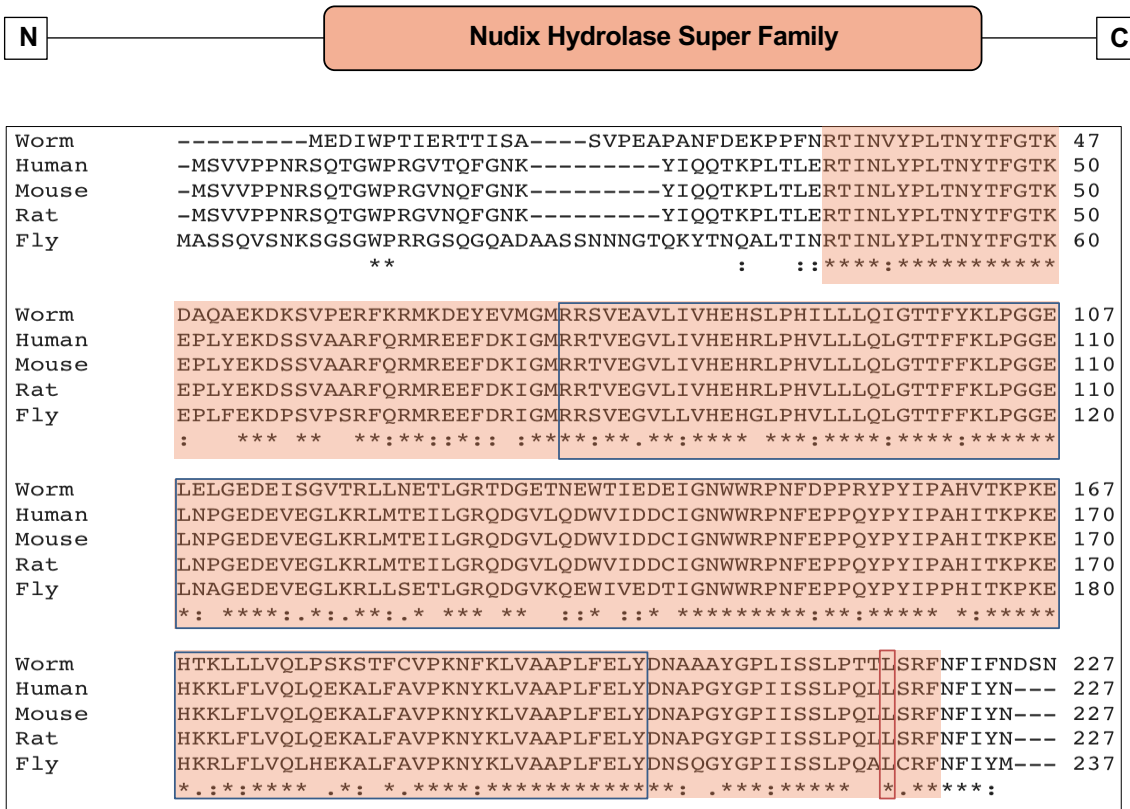

Nudix domain (Yang et al., 2011)      CFim68 and CFim59 tethering site (Zhu et al., 2017)

*cfim-2* (CFim68)

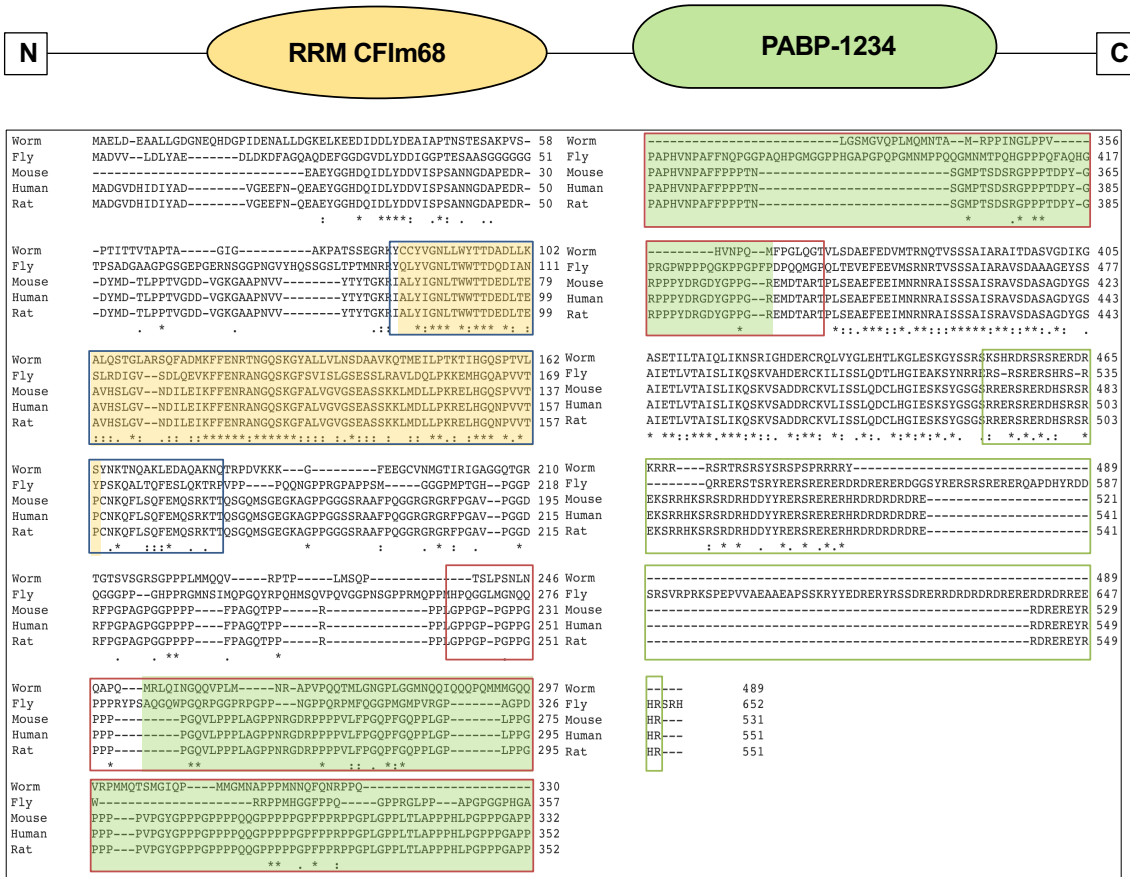

RRM domain (Yang et al., 2011, Martin et al., 2010)      RS/RD/RE region (Yang et al., 2011)

Pro/Gly-rich region (Yang et al., 2011)

*clpf-1* (CLP1)

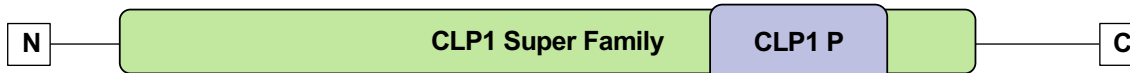

|       |                                                                       |     |       |                                                                             |     |
|-------|-----------------------------------------------------------------------|-----|-------|-----------------------------------------------------------------------------|-----|
| Worm  | -----MSEENVOEFVLKEDCELRFAAGDD-SDVCLLVKGYAEIPGTELLNKKYTFPA             | 53  | Worm  | VDGEGYKIVKAASAFEVDVVVLDHERLVSDELKELPEFVRLTHVPSKGGVEQRTGQIR                  | 293 |
| Fly   | -----MSBDGKDYLTLESDELRFIEQKDAKVLVSLVSGFAELPGTELKVKKQVEFGV             | 54  | Fly   | VKGGYAHLLHAAKAYGACAIPLVDQERLYNELRDVPHGVHVVLLPKSGGVVERSKELR                  | 288 |
| Human | MGEESNDKKHPTKFELERETFLRFEVEASQ-SVQLELLTGMAEIPGTELTRNKKFTFDA           | 59  | Human | VKGGYQALVHAASAFEVDVVVLDQERLYNELRDLPHFVRTVLLPKSGGVVERSKDFR                   | 293 |
| Rat   | MSEESNDKKHPTKFELERETFLRFEVEASQ-SVQLELLTGMAEIPGTELTRNKKFTFDA           | 59  | Rat   | VKGGYQALVHAASAFEVDVVVLDQERLYNELRDLPHFVRTVLLPKSGGVVERSKDFR                   | 293 |
| Mouse | MSEESNDKKHPTKFELERETFLRFEVEASQ-SVQLELLTGMAEIPGTELTRNKKFTFDA           | 59  | Mouse | VKGGYQALVHAASAFEVDVVVLDQERLYNELRDLPHFVRTVLLPKSGGVVERSKDFR                   | 293 |
|       | .. : : * : : * * * * . . * : : * * * * * * : : * : *                  |     |       | * : * * : : * * * * : : : : * * * * * * : : : : * : * : : * * * * * * : : * |     |
| Worm  | KSRVAATPKGATIELVGTESAYVAESTPMVYILNIHAAMEVRRKREDAAGSNKKR               | 113 | Worm  | SKMRGENVHRYFVCTRANLYPTFDVSFDVTLCKIGAEQLPDSCLPFGMEVNHETKL                    | 353 |
| Fly   | GAKVAIFTYQCVLHVSGKMDVCIYISKETPMQVYVNCCHAALQFRMEARH-----KDHV           | 108 | Fly   | HEARDQRIKEYFVGNTRAPPYPSFEVVFQDLRLYKIGAPLPDSCMPIGKAEKDNRKV                   | 348 |
| Human | GAKVAFTWHGCSVLQSGRTEVAYVSKDTPMLLYLNTHTALEQMRRAK-----EEHR              | 113 | Human | RECRDERIREYFYGF-RGCFYPAFNVKFSDVKIYKVGAPTIIPDSCLPLGMSQEDNQLKL                | 352 |
| Rat   | GAKVAFTWHGCSVLQSGRTEVAYVSKDTPMLLYLNTHTALEQMRRAK-----EEHR              | 113 | Rat   | RECRDERIREYFYGF-RGCFYPAFNVKFSDVKIYKVGAPTIIPDSCLPLGMSQEDNQLKL                | 352 |
| Mouse | GAKVAFTWHGCSVLQSGRTEVAYVSKDTPMLLYLNTHTALEQMRRAK-----EEHR              | 113 | Mouse | RECRDERIREYFYGF-RGCFYPAFNVKFSDVKIYKVGAPTIIPDSCLPLGMSQEDNQLKL                | 352 |
|       | : : * * * * : : * : : * : : * * * * : * * * * * * : * : *             |     |       | : * : : : * * * * : * * : * * * * : * * * * * * * * * * : * : * : *         |     |
| Worm  | GPRLLLVGPIDVGKTVSRILCNYSVRQGRTEFVVELDVGGQNSVSPGTVAAVLVQKTD            | 173 | Worm  | VIMEPSADIKHHLAFSRSTKADENVLKSVPVGFCLVTEVDLEKRTMSILCPQRT-IP-S                 | 411 |
| Fly   | GPVAMVVGPMVDGKSTLCRILLNYAVRGRRLYADLDVGGQSAISGVSATILLIERPAN            | 168 | Fly   | VAVTTPPALIHVLLALSPAESVEDDVGTVAGFCVTEVDMERQAVMLLSPQRPRLPPN                   | 408 |
| Human | GPRVMVVGPTDVGKSTVCRLLLNAYVRLGRRTYVELDVGGQSSVIPCTMGALYIERPAD           | 173 | Human | VPVTPGRDMVHLLSVSTAEGTEENLETSVAGFIVVTSVDLEHQVFTVLSFAPRPLPKN                  | 412 |
| Rat   | GPRVMVVGPTDVGKSTVCRLLLNAYVRLGRRTYVELDVGGQSSVIPCTMGALYIERPAD           | 173 | Rat   | VPVTPGRDMVHLLSVSTAEGTEENLETSVAGFIVVTSVDLEHQVFTVLSFAPRPLPKN                  | 412 |
| Mouse | GPRVMVVGPTDVGKSTVCRLLLNAYVRLGRRTYVELDVGGQSSVIPCTMGALYIERPAD           | 173 | Mouse | VPVTPGRDMVHLLSVSTAEGTEENLETSVAGFIVVTSVDLEHQVFTVLSFAPRPLPKN                  | 412 |
|       | * * : : * * * * * * : * * * * * * * * : : * * * * * * : : * : * : *   |     |       | * : * : * * * * * * : * * * * * * * * : : * * * * * * : : * * * : *         |     |
| Worm  | VIDGFERNQPIVFNFGHTSFSANLSLYALFKEMATTLNAQIQENDEAKIGGMIINTCGW           | 233 | Worm  | KVLVFSIDITHLDDQEKRR                                                         | 428 |
| Fly   | VEEGFAKTAFLVYHFGHKSFGNSVLYLAVSRKMAEVTLQSLNSKRTKSSGIIINTCGW            | 228 | Fly   | ALLLWSELQFMDK                                                               | 423 |
| Human | VEEGFSIQALVYHFGSTTPGTMIKLYKITSRLADVFNQRCVNRRAVSQGVINTCGW              | 233 | Human | FLLI-MDIRFMDK                                                               | 425 |
| Rat   | VEEGFSIQALVYHFGSTTPGTMIKLYKITSRLADVFNQRCVNRRAVSQGVINTCGW              | 233 | Rat   | FLLI-MDIRFMDK                                                               | 425 |
| Mouse | VEEGFSIQALVYHFGSTTPGTMIKLYKITSRLADVFNQRCVNRRAVSQGVINTCGW              | 233 | Mouse | FLLI-MDIRFMDK                                                               | 425 |
|       | * : * * * * * * : * * * * * * * * : : * * * * * * : : * * * * * * : * |     |       | * * : : * * : *                                                             |     |

- N-terminal domain (Dikfidan et al., 2014)
- Polynucleotide kinase domain (Dikfidan et al., 2014)
- C-terminal domain (Dikfidan et al., 2014)
- Residues that crosslink to Pcf-11 (Schäfer et al., 2018)

*rbpl-1* (RBBP6)

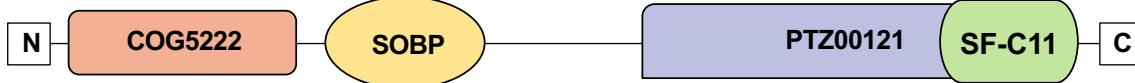

|       |                                                            |     |       |                                                             |      |
|-------|------------------------------------------------------------|-----|-------|-------------------------------------------------------------|------|
| Worm  | MSSIHYKFAELDYKTLQFDGLHTRGQLVREICAKENL-KLEIFELQNAHTKTYTS    | 59  | Worm  | SSTINTADEDDSSKMKKHKSKKNNKHKHREEDGDEERKRRKHKHKHKKSKKEK       | 810  |
| Fly   | -MSVHYKFKSLNPTFTFDGLHISVGLKREIVQGRKGLIIDFLQITNAQSKREYK     | 59  | Fly   | SSK-----GDSK-----ARGDNR-----HEAPRRHRSRSISEPK                | 738  |
| Human | MSCVHYKFSKSLNPTFTFDGLHISLCLDKLQKIMGREKL-KAADCDLQITNAQKREYD | 59  | Human | NKDNPKSKKEESEN-----AFDGGK-----GN-KHKHRRKRGKEE--             | 944  |
| Rat   | MSCVHYKFSKSLNPTFTFDGLHISLCLDKLQKIMGREKL-KAADSDLQITNAQKREYD | 59  | Rat   | NPKDNPKSKKEESEN-----VFDGGK-----GN-KHKHRRKRGKEE--            | 930  |
| Mouse | MSCVHYKFSKSLNPTFTFDGLHISLCLDKLQKIMGREKL-KAADSDLQITNAQKREYD | 59  | Mouse | NKDNPKSKKEESEN-----VFDGGK-----GN-KHKHRRKRGKEE--             | 945  |
| Worm  | D-ELIPRNSIIVQFRPKDAKRVQVAGVGNVQLDATSFLDSSIHSSAE            | 114 | Worm  | RDE--DEDDLTEKKEK-----KERKYODK-----DEDSNRKE-----PR           | 845  |
| Fly   | DFPLIPKNTLITSRIPAHFKK--GWE--PPAAENAFSA-----APAKQDNFN       | 105 | Fly   | PNSNYSRLTTPPAKITTP-----KMTAQLROR                            | 766  |
| Human | DNALIPKNSVIVRRIPGVGVSKSTYV--ISRTPEAMATKADDSASISLAQLTKT     | 117 | Human | -----SEGLFPELLETSSKRSRFTGVEENKTDLVLPVSRDPAVPRDEMDAEIFTK     | 999  |
| Rat   | DNALIPKNSVIVRRIPGVGVSKSTYV--ISRTPEVMGTAKADDSASISLAQLTKT    | 117 | Rat   | -----SEFLPELLETSSKRSRSGIDETKTDALVLPVSRDPAVPRDEMDAEIFTK      | 985  |
| Mouse | DNALIPKNSVIVRRIPGVGVSKSTYV--ISRTPEVMGTAKADDSASISLAQLTKT    | 117 | Mouse | -----SEFLPELLETSSKRSRSGIDETKTDLVLPVSRDPAVPRDEMDAEIFTK       | 1000 |
| Worm  | ----FENDEAEKRLHHRDQSTRAYDQSNFRRRQPGIMTGPPTTNCNCSQGHWYK     | 170 | Worm  | SLDDEKVELDKNFA--DKKEKKGKWEDEEIPEDRKEELPKESDRDRDRDRHDE       | 902  |
| Fly   | MDLSKMGQTEEDIQAMMGSQVTDVDPKTYHRKLGQSQVGEVPSYCNCKKSGHWYK    | 165 | Fly   | E-----SSPK-----TPKSHDDYLAKARIM-----ASQFV                    | 794  |
| Human | ANLAEANASEEDKIKAMMSQGHGYDPINYMK--KPLGPPPSVYTCFCGKPGHYIK    | 173 | Human | SVEKDKRERDKPKAGDKTKRKNDSGSAVSKENIKVPAKQPEKVDGERERSRSEPT     | 1059 |
| Rat   | ANLAEANASEEDKIKAMMSQGHGYDPINYMK--KTLVGPPPSVYTCFCGKPGHYIK   | 159 | Rat   | SVEKDKRERDKPKVKSDDTKRKSOGGATAKENVLKPSGQDKVDGERERSRSEPT      | 1045 |
| Mouse | ANLAEANASEEDKIKAMMSQGHGYDPINYMK--KTLVGPPPSVYTCFCGKPGHYIK   | 174 | Mouse | SVSDKREKDKPKVKSDDTKRKSOGGATAKENVLKPSGQDKVDGERERSRSEPT       | 1065 |
| Worm  | CPMLNT-----KRTTISQELMETTV-DPDDAMHPSGVIPIMHWKARQETLA        | 220 | Worm  | DDRKERRHERDSQKIDQDRKREKRDRETAJD-SDKLQAPTKVREKDRKDRKDYE      | 961  |
| Fly   | CFPVGQKQDQ--EVRKNTGIPRSFRDKPDAEN-----ESADVLP               | 204 | Fly   | NDTME-----TIVGKFNKA-----KSLDKDRK-----KKKD                   | 823  |
| Human | CPTNODKNEFEGRIKKSQIPIRSMFMEVQDPMKGMALNTGKVAIPITIDAEAYIAGK  | 233 | Human | KKAEEPTKDTNTPSSSSQDEKICTPTPKRAHSAKHEQKPKVKEEYV-----KRDYS    | 1115 |
| Rat   | CPTNODKNEFEGRIKKSQIPIRSMFMEVQDPMKGMALNTGKVAIPITIDAEAYIAGK  | 219 | Rat   | KKAEEATKDVSPSSS-QDKEVCTCTPKRAHSAKHEQKPKVKEEYV-----KRDYS     | 1100 |
| Mouse | CPTNODKNEFEGRIKKSQIPIRSMFMEVQDPMKGMALNTGKVAIPITIDAEAYIAGK  | 234 | Mouse | KKAEEATKDVSPSSS-QDKEVCTCTPKRAHSAKHEQKPKVKEEYV-----KRDYS     | 1116 |
| Worm  | RK--NEDGSSPAQTSRKYPELLCPTCQSLFKFAIIVTSCCGNSYCAICLEARLDDPP  | 277 | Worm  | RDREKRDYKKEKES-----KRKEEDRNEKEQREKEVEKEKEDK-----EKRR        | 1008 |
| Fly   | -----AYQNGEIPEDLTCGICRQIVDVAIMICSSSFCDCVRLTLESEED          | 251 | Fly   | KDVS-KLTKTEKAKKPKNEKPKLNGEKEKREKREKREKREKREKREKREKREKREK    | 871  |
| Human | EKPPFPEPSSSEEDDPIPELLLCLCKIDMTDAVIPCPCNSYDCICIRTALESSE     | 293 | Human | KDVS-KLTKTEKAKKPKNEKPKLNGEKEKREKREKREKREKREKREKREKREKREK    | 1174 |
| Rat   | EKPPFPEPSSSEEDDPIPELLLCLCKIDMTDAVIPCPCNSYDCICIRTALESSE     | 279 | Rat   | KDVS-KLTKTEKAKKPKNEKPKLNGEKEKREKREKREKREKREKREKREKREKREK    | 1156 |
| Mouse | EKPPFPEPSSSEEDDPIPELLLCLCKIDMTDAVIPCPCNSYDCICIRTALESSE     | 294 | Mouse | KDVS-KLTKTEKAKKPKNEKPKLNGEKEKREKREKREKREKREKREKREKREKREK    | 1174 |
| Worm  | QKCPGADGCKDITISIPINKTLADAAJLWLSATCGAPDTPQVDFEFPQ-----RIR   | 331 | Worm  | IVKESKPKRKSVERHMQKADSTSSSSRRTTAPSLEKPKVSTVA-SKSPFTNIRV---   | 1064 |
| Fly   | SCPCDCK-EKMCSPGSLINPRFLRNSVNAFKNETGYNKSAAKPAVKNREKPKVEKVEK | 310 | Fly   | VLN--PRA-----QSPSIEINAA                                     | 889  |
| Human | HTCPTCH-QNDVSDALIANKLRQAVNFKNETGYTKRLKQIPLPPPPVPPPPPIQR    | 352 | Human | IVK--PSPKRMEPDT-----KMDRTEPKKISL-SAPAKIKILNRE               | 1214 |
| Rat   | HTCPTCH-QNDVSDALIANKLRQAVNFKNETGYTKRLKQIPLPPPPVPPPPPIQR    | 338 | Rat   | IVK--PSPKRMEGQV-----KLERTEPKKASSTTPAKIKILNRE                | 1197 |
| Mouse | HTCPTCH-QNDVSDALIANKLRQAVNFKNETGYTKRLKQIPLPPPPVPPPPPIQR    | 353 | Mouse | IVK--PSPKRMEGQV-----KLERTEPKKASSTTPAKIKILNRE                | 1215 |
| Worm  | ----IGLK-----APSSSQOITPSCISPGST-----LWOOQ                  | 359 | Worm  | ----QL-----ROYSSSST                                         | 1073 |
| Fly   | -----KPVAEV-EPEETE-----KPEKO-KESETNGSNPKS-----ESPEPA       | 348 | Fly   | TKGKIGNSTENSTKPESEKLESTSSKVKQEVKGVKRVKRTVTEGSSSLVDVTSST     | 1274 |
| Human | NLQPLMRSPISROQDPLMIVTSSAHTPSISLSTNSQSSALPVPNGSPSAPAVPDI    | 412 | Human | TKGKIGNAENSTKPESEKLESTSSKIKQEVKGVKARRVAGTEGSSSLVDVTSST      | 1257 |
| Rat   | NLQPLMRSPISROQDPLMIVTSSAHTPSISLSTNSQSSALPVPNGSPSAPAVPDI    | 398 | Rat   | TKGKIGNAENSTKPESEKLESTSSKIKQEVKGVKARRVAGTEGSSSLVDVTSST      | 1275 |
| Mouse | NLQPLMRSPISROQDPLMIVTSSAHTPSISLSTNSQSSALPVPNGSPSAPAVPDI    | 413 | Mouse | TKGKIGNAENSTKPESEKLESTSSKIKQEVKGVKARRVAGTEGSSSLVDVTSST      | 1275 |
| Worm  | T-----TLTYS-SGCTSL-----                                    | 371 | Worm  | KQEDEERSKDRRKKDETDVESIGKEKESKSRKVPKESVDVVKHSTKIKFDI---      | 1127 |
| Fly   | TEPS--QKEKDYSDVEDNITIKMPQPAADS-----                        | 379 | Fly   | --SPT-----HNATENVNPKSHSILTVGAASDDNLGPKSKLSEANSVNLKWEIDENILG | 942  |
| Human | TATVSVHSEKSDGQFRDSDNKLPAALASEHSKGTSSIAITALMEEKYQVPLVTP     | 472 | Human | GGSPV-----RKSEKTDTRKVTIKTMEYNDNTAPAEVIMIQVQSGKWDKDFESE      | 1329 |
| Rat   | TATVSVHSEKSDGQFRDSDNKLPAALASEHSKGTSSIAITALMEEKYQVPLVTP     | 458 | Rat   | GGSPV-----RKSEKTDTRKVTIKTMEYNDNTAPAEVIMIQVQSGKWDKDFESE      | 1312 |
| Mouse | TATVSVHSEKSDGQFRDSDNKLPAALASEHSKGTSSIAITALMEEKYQVPLVTP     | 473 | Mouse | GGSPV-----RKSEKTDTRKVTIKTMEYNDNTAPAEVIMIQVQSGKWDKDFESE      | 1330 |
| Worm  | -----SAQPS-----                                            | 376 | Worm  | LDSSK--KAAGADQPSSETSVDLRAENAFKATAMALRFPQ-----VTL            | 1127 |
| Fly   | -----TVFVSRKSPSYSHRSSE-----SHRRDSDYVSD                     | 408 | Fly   | E-EDVKSTQPISSVGVKPVASIKNVSTKPSNIVKVPKESPEKIQKFDVSHIIOHE     | 1388 |
| Human | SLLGQSLHGLQIPLTTPGVRIINARAGGRRGVEHNSKLGYSVPPQIIRGERSCYRS   | 532 | Human | EEDVKTQPIOSVQKPSIINKVTTKPSATVKTKEKESPEKIQKFDVSHIIOHE        | 1372 |
| Rat   | SLLGQSLHGLQIPLTTPGVRIINARAGGRRGVEHNSKLGYSVPPQIIRGERSCYRS   | 518 | Rat   | EEDVKTQPIOSVQKPSIINKVTTKPSATVKTKEKESPEKIQKFDVSHIIOHE        | 1389 |
| Mouse | SLLGQSLHGLQIPLTTPGVRIINARAGGRRGVEHNSKLGYSVPPQIIRGERSCYRS   | 533 | Mouse | EEDVKTQPIOSVQKPSIINKVTTKPSATVKTKEKESPEKIQKFDVSHIIOHE        | 1389 |
| Worm  | -----NVNPSIPGIPLASQVPSH-----VQDVSLLPPLQROE                 | 408 | Worm  | -----NSK-----DNSKDRSVRSDDRSSPRRNSN-----RSVDRKLTGK-----ISN   | 1128 |
| Fly   | HDHKKQ--RPS--KESVNRDRLSLLPGLTFLPSYQGHMAESEARRSAYKPY--MQ    | 462 | Fly   | VSKNSGASSEKGTKDDYSLVENKPN--EKRNKSTQPEKESKRRKDRKTRKDSV       | 1046 |
| Human | NRGRHRSERSORTQGPSLPTATVFFVFPVPP-----PLYPPPHLTL             | 573 | Human | LRSKGSVSEKGRADKDHASAKEDNP--DKRRTIQDPEKSTVDRLSQGHFKMLOS      | 1430 |
| Rat   | NRGRHRSERSORTQGPSLPTATVFFVFPVPP-----PLYPPPHLTL             | 559 | Rat   | LRSKGSVSEKGRADKDHASAKEDNP--DKRRTIQDPEKSTVDRLSQGHFKMLOS      | 1447 |
| Mouse | NRGRHRSERSORTQGPSLPTATVFFVFPVPP-----PLYPPPHLTL             | 574 | Mouse | LRSKGSVSEKGRADKDHASAKEDNP--DKRRTIQDPEKSTVDRLSQGHFKMLOS      | 1447 |
| Worm  | LPFGIPGLPQGLPPGQVGLSATVLPQHGMLNYGM-----PLFSAGFPVAVSVRPS    | 464 | Worm  | -----DRSRDRSKGRRAARSDDANRGRSDRH-----GSRKRNRL--SRDRAEPE      | 1128 |
| Fly   | MORGPPPHMMS-----HHMAYNFGNFMNMGQRPPLSVYQNGSVHMRAPYSAGGGMNM  | 519 | Fly   | SKAERTSDKHS-----TRASNKDFTPNRKDDYDREYSSSKRDEKRELTRKDSVPR     | 1078 |
| Human | LPFGVFPV-----QFSQF--PPGQPPAGYSV-----PPGPF--PAPA            | 609 | Human | SKETRTEKES-----VRSNKNDFTPGRDKKVDYSDRYSVSKRDEKRELTRKDSVPR    | 1503 |
| Rat   | LPFGVFPV-----QFSQF--PPGQPPAGYSV-----PPGPF--PAPA            | 595 | Rat   | SKETRTEKES-----VRSNKNDFTPGRDKKVDYSDRYSVSKRDEKRELTRKDSVPR    | 1487 |
| Mouse | LPFGVFPV-----QFSQF--PPGQPPAGYSV-----PPGPF--PAPA            | 610 | Mouse | SKETRTEKES-----VRSNKNDFTPGRDKKVDYSDRYSVSKRDEKRELTRKDSVPR    | 1504 |
| Worm  | AISDEWN-----AFLQNKDRNSRR--DHKDRTR-----                     | 491 | Worm  | -----KROERSYK-----RSSPEDDKLIRKQESQSKHG-----KHDC             | 1128 |
| Fly   | NMSQFQSNLAIYQVAAKVGGSDIDPLEAFN--RIMKEKE--RKKVDRFR-----     | 569 | Fly   | NKDSASQGNKPREKRDLPKGTGDSKKSNSPSRDRKHDKATYTRKRNKETSVD        | 1563 |
| Human | NLSTPWSVSGVTAHNSITPTQAPPLSR--EFFYRORLKEEKKSKLDEFTNDFAK     | 667 | Human | SKDSLSQKSKLREKDLPKQTE--LAKNSNSPDRKPKHDKAAYTRKRNKETSVD       | 1546 |
| Rat   | NLSTPWSVSGVTAHNSITPTQAPPLSR--EFFYRORLKEEKKSKLDEFTNDFAK     | 653 | Rat   | SKDSLSQKSKLREKDLPKQTE--LAKNSNSPDRKPKHDKAAYTRKRNKETSVD       | 1546 |
| Mouse | NLSTPWSVSGVTAHNSITPTQAPPLSR--EFFYRORLKEEKKSKLDEFTNDFAK     | 668 | Mouse | SKDSLSQKSKLREKDLPKQTE--LAKNSNSPDRKPKHDKAAYTRKRNKETSVD       | 1563 |
| Worm  | -----RKRDRSRRRRRSSSSSSSSSS--DEDERK-----RKRREK--ESSKRRSV    | 538 | Worm  | -----KRSRYSK-----RSSPEDDKLIRKQESQSKHG-----KHDC              | 1128 |
| Fly   | -----SSDRSRSDRGRHRFSRPH--EKDNRDRKDRP-----                  | 605 | Fly   | NKDSASQGNKPREKRDLPKGTGDSKKSNSPSRDRKHDKATYTRKRNKETSVD        | 1563 |
| Human | ELMEYKIKQKRRRFRSRSKSPYSGSYRSSTYSKRSRSGTRSRYSRFSRSHRSY      | 713 | Human | NKDKREKHVLE--RNKESGSKNLLIYLPFPQVEKELTQGDISTKVPKPOLSHS       | 1622 |
| Rat   | ELMEYKIKQKRRRFRSRSKSPYSGSYRSSTYSKRSRSGTRSRYSRFSRSHRSY      | 713 | Rat   | NGKEREKHAASRNKESGSKLPSIPNPPDMKELAAQVKSAAVKPKPOLSHS          | 1606 |
| Mouse | ELMEYKIKQKRRRFRSRSKSPYSGSYRSSTYSKRSRSGTRSRYSRFSRSHRSY      | 728 | Mouse | NSGKERKHAASRNKESGSKLPSIPNPPDMKELAAQVKSAAVKPKPOLSHS          | 1622 |
| Worm  | EK--ERFRADREHRRDRDRDRDRDRDRDRDRDRDRDRDRDRDRDRDRDRDRDR      | 596 | Worm  | -----SSSSSLVQYDNTI-----QKE-----GAS                          | 1128 |
| Fly   | -----RSRERKREHRYRHHRHRSRQPNDSG-----                        | 633 | Fly   | RLSSDLTRETDEAAPPDYNESDESNSVVKEEAVASISDKLKEKTEKASLTVAT       | 1662 |
| Human | SRSPPYPRGRGK-----SNRYSRSHSGYHRSRSPYRYSRSHRSRSHAFRQGSPT     | 782 | Human | RLSSDLTRETDEAAPPDYNESDESNSVVKEEAVASISDKLKEKTEKASLTVAT       | 1682 |
| Rat   | SRSPPYPRGRGK-----SNRYSRSHSGYHRSRSPYRYSRSHRSRSHAFRQGSPT     | 768 | Rat   | RLSSDLTRETDEAAPPDYNESDESNSVVKEEAVASISDKLKEKTEKASLTVAT       | 1682 |
| Mouse | SRSPPYPRGRGK-----SNRYSRSHSGYHRSRSPYRYSRSHRSRSHAFRQGSPT     | 783 | Mouse | RLSSDLTRETDEAAPPDYNESDESNSVVKEEAVASISDKLKEKTEKASLTVAT       | 1682 |
| Worm  | RDDVRRKERREKREEDDQKTKDAESKDEDEIDIGIIEAYGNVQA-----          | 643 | Worm  | -----SDNGMEHRKQR-----DKLKHHSK--YSSTDLSKSKRDKPKSKKSKL        | 1128 |
| Fly   | -----KSPFG--RKRSGH-----RRSASP--KPYG--KSDYRD-----           | 661 | Fly   | VQVGISRNQSHSSPSVSRSHSPSGQTRSHSSSSASASQDSKSKKSKKSKKSKKSKK    | 1224 |
| Human | KRNVPQG--ETEREYF-----NRYREV--PPYD--MKAYGRSVDPRDFEKERYEW    | 830 | Human | SQPADRSOSQSSPSVSRSHSPSGQTRSHSSSSASASQDSKSKKSKKSKKSKKSKK     | 1742 |
| Rat   | KRNVPQG--ETEREYF-----NRYREV--PPYD--IKAYGRSVDPRDFEKERYEW    | 816 | Rat   | SQPADRSOSQSSPSVSRSHSPSGQTRSHSSSSASASQDSKSKKSKKSKKSKKSKK     | 1726 |
| Mouse | KRNVPQG--ETEREYF-----NRYREV--PPYD--IKAYGRSVDPRDFEKERYEW    | 831 | Mouse | SQPADRSOSQSSPSVSRSHSPSGQTRSHSSSSASASQDSKSKKSKKSKKSKKSKK     | 1742 |
| Worm  | -----QTDGDAQVAENAGNDESTSPKESVSKPDETHEEADDEEVPDEEM--        | 692 | Worm  | -----KSKSKK-----                                            | 1128 |
| Fly   | -----KPY--NKP-----SAPKTEAVEPPGPELQLTDED-----               | 691 | Fly   | KKKSKK-----                                                 | 1231 |
| Human | EKRYEWEKYYKGYVAG-----AQPRSANRENFSPEFLPLNIRNSPFRGRRE        | 881 | Human | KHKHKHAGTEVELEKSKQKHKHKKSKKKNKDEKKEKEDKQKVSVTV              | 1792 |
| Rat   | EKRYEWEKYYKGYVAG-----AQPRSANRENFSPEFLPLNIRNSPFRGRRE        | 867 | Rat   | KHKHKHAGVQGVKSKQRHKHKKSKKKNKDE--KEDDQKVSVTV                 | 1774 |
| Mouse | EKRYEWEKYYKGYVAG-----AQPRSANRENFSPEFLPLNIRNSPFRGRRE        | 882 | Mouse | KHKHKHAGVQGVKSKQRHKHKKSKKKNKDE--KEDDQKVSVTV                 | 1790 |
| Worm  | --DTEVVDRKSDIPVYQAMETSEAEVAETKESVVEDEEENHEDVEDHKKESQ       | 750 |       |                                                             |      |
| Fly   | QTRKKEPT-----SER--                                         | 908 |       |                                                             |      |
| Human | DYVGGQSHRNRNIGSNVPEK-----LSARDGH                           | 908 |       |                                                             |      |
| Rat   | DYVAGQSHRNRNIGSNVPEK-----ISTRDSH                           | 894 |       |                                                             |      |
| Mouse | DYAGQSHRNRNIGSNVPEK-----LSTRDSH                            | 909 |       |                                                             |      |

- Domain With No Name (DWN), ubiquitin-like (Pugh et al., 2006)
- RING finger domain (Chibi et al., 2008, Lee et al., 2014)
- Proline-rich domain (Pugh et al., 2006)
- SR domain (Pugh et al., 2006)
- Rb-binding domain (Pugh et al., 2006)
- Zinc knuckle (Lee et al., 2014)
- p53-binding domain (Pugh et al., 2006)





| Name                                               | Experiment # | Eggs/Hatched | Lethality (%) |
|----------------------------------------------------|--------------|--------------|---------------|
| <b><i>cpsf-1</i></b><br>( <i>CPSF160</i> )         | 1            | 163/11       | 93.7          |
|                                                    | 2            | 238/5        | 97.9          |
|                                                    | 3            | 149/1        | 99.3          |
| <b><i>cpsf-2</i></b><br>( <i>CPSF100</i> )         | 1            | 68/37        | 64.8          |
|                                                    | 2            | 178/28       | 86.4          |
|                                                    | 3            | 221/25       | 89.8          |
| <b><i>cpsf-4</i></b><br>( <i>CPSF30</i> )          | 1            | 323/5        | 98.5          |
|                                                    | 2            | 699/17       | 97.6          |
|                                                    | 3            | 204/3        | 98.6          |
| <b><i>cpf-1</i></b><br>( <i>CstF-50</i> )          | 1            | 251/76       | 76.8          |
|                                                    | 2            | 200/64       | 75.8          |
|                                                    | 3            | 185/25       | 88.1          |
| <b><i>cpf-2</i></b><br>( <i>CstF-64</i> )          | 1            | 446/54       | 89.2          |
|                                                    | 2            | 138/14       | 90.8          |
|                                                    | 3            | 61/3         | 95.3          |
| <b><i>cfim-1</i></b><br>( <i>CFIm25</i> )          | 1            | 249/23       | 91.5          |
|                                                    | 2            | 196/20       | 90.7          |
|                                                    | 3            | 154/2        | 98.7          |
| <b><i>cfim-2</i></b><br>( <i>CFIm68</i> )          | 1            | 137/1        | 99.3          |
|                                                    | 2            | 282/27       | 91.3          |
|                                                    | 3            | 260/32       | 89.0          |
| <b><i>lrp-2</i></b><br>( <i>CFIm59</i> )           | 1            | 311/116      | 72.8          |
|                                                    | 2            | 281/97       | 74.3          |
|                                                    | 3            | 222/93       | 70.5          |
| <b><i>symk-1</i></b><br>( <i>Symplekin</i> )       | 1            | 62/4         | 93.9          |
|                                                    | 2            | 19/4         | 82.6          |
|                                                    | 3            | 114/5        | 95.8          |
| <b><i>rbpl-1</i></b><br>( <i>RBBP6</i> )           | 1            | 293/0        | 100           |
|                                                    | 2            | 344/0        | 100           |
|                                                    | 3            | 116/0        | 100           |
| <b><i>pcf-11</i></b><br>( <i>CPF11</i> )           | 1            | 141/5        | 96.6          |
|                                                    | 2            | 105/0        | 100           |
|                                                    | 3            | 172/5        | 97.2          |
| <b><i>clpf-1</i></b><br>( <i>CLP1</i> )            | 1            | 286/23       | 92.6          |
|                                                    | 2            | 289/18       | 94.1          |
|                                                    | 3            | 208/17       | 92.4          |
| <b><i>pkc-3</i></b><br>( <i>negative control</i> ) | 1            | 5/0          | 100           |
|                                                    | 2            | 8/0          | 100           |
|                                                    | 3            | 18/1         | 94.7          |
|                                                    | 4            | 51/1         | 98.1          |
|                                                    | 5            | 3/0          | 100           |
|                                                    | 6            | 22/0         | 100           |
|                                                    | 7            | 53/0         | 100           |
|                                                    | 8            | 6/0          | 100           |
|                                                    | 9            | 13/0         | 100           |
|                                                    | 10           | 19/0         | 100           |
|                                                    | 11           | 5/0          | 100           |
|                                                    | 12           | 4/0          | 100           |

**Supplemental Fig. S2: Results of the RNAi experiments of the *C. elegans* CPC:** Twelve genes for the members of the *C. elegans* CPC were knocked-down using RNAi. Clones/rows are color-coded as from Figure 1. The human orthologs of each gene are shown in parenthesis in the first column. For each RNAi experiment we use 15 worms, and the number of eggs unhatched vs hatched at the end of the experiment were counted. The percent lethality was consistently high across all tested clones. *pkc-3* RNAi was used as a negative RNAi control, since it is known to induce strong embryonic lethality.

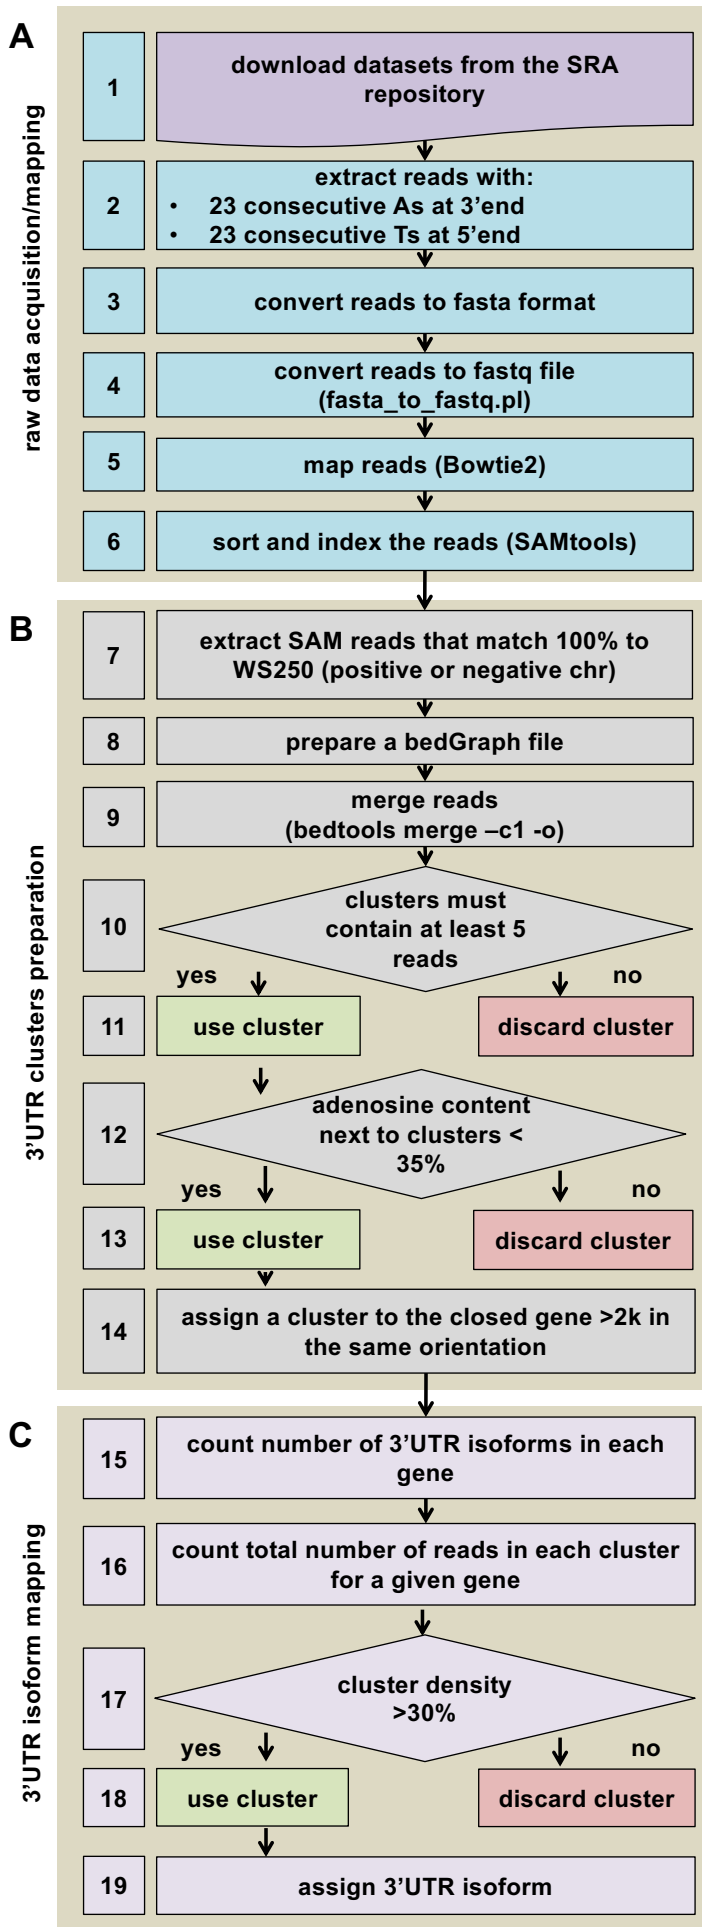

**Supplemental Fig. S3: Bioinformatic Pipeline used in this study:** The pipeline uses raw transcriptome datasets downloaded from the public repository SRA trace archive to extract and map 3'UTR end clusters to the closest protein-coding genes in the correct orientation. The pipeline is divided in three large steps: A) Acquisition/Mapping, B) 3'UTR cluster preparation and C) 3'UTR isoforms mapping.

In the acquisition/mapping step, we used custom made Perl scripts to extract reads with 23 consecutive As at the 3' end or 23 consecutive Ts at the 5' end, and then mapped these filtered reads to the WS250 version of the *C. elegans* genome (Bowtie2).

We then sorted and indexed the reads for visualization purposes.

In the 3'UTR cluster preparation step we extracted SAM reads with 100% match to the WS250, and used them to prepare a new bedGraph file (BEDTools).

We then merged the reads and discarded the clusters with less than 5 reads. Restrictive parameters for cluster identification and 3'UTR end mapping included the discard of clusters with an Adenosine content of <35% downstream of its end.

Clusters were assigned to a mapped 3'UTR end and attached to the closest gene with 2,000nt in the same orientation.

At the completion of these steps we performed the 3'UTR isoform mapping step, which consists of the counting and assignment the total number of 3'UTR isoforms to a given gene.

We discarded clusters with a density of less than 30% of the total number of reads.

**A****PAS switch in genes with two 3'UTR isoforms with at least 10nt differences (n=4,750 genes)**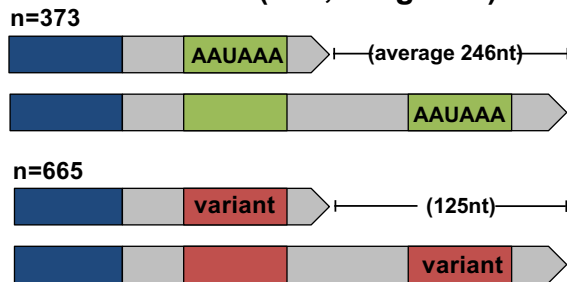**B****PAS switch in genes with three or more 3'UTR isoforms with at least 10nt differences (n=766 genes)**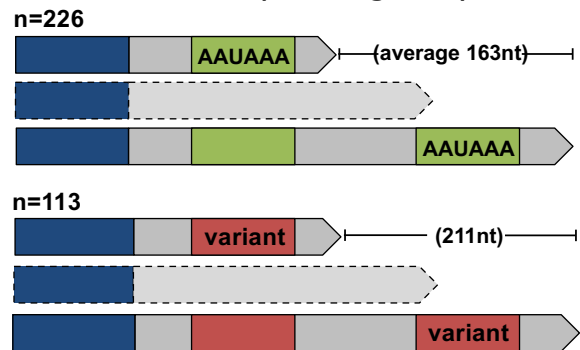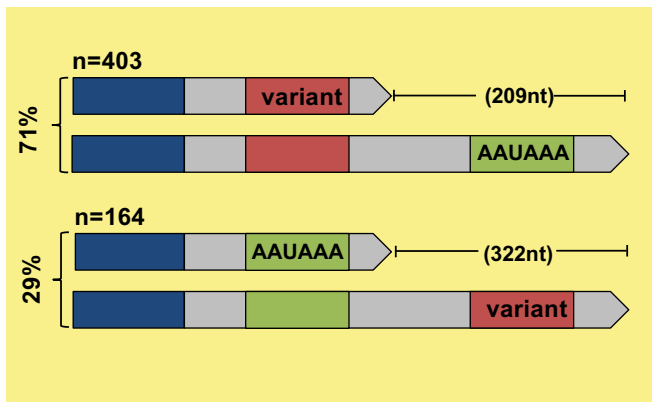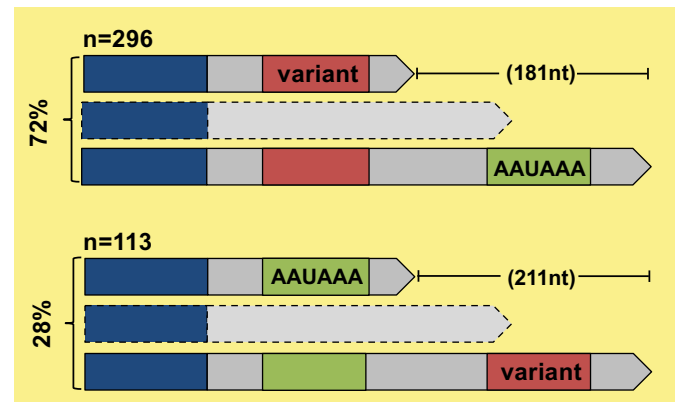

**Supplemental Fig. S4: PAS site usage in genes with multiple 3'UTR isoforms.** A) In genes with only two 3'UTR isoforms with a difference of at least 10nt between isoforms, 373 pairs of isoforms had canonical PAS elements in both isoforms with an average of 246nt difference between isoforms while 665 pairs had variant PAS elements in both isoforms with an average of 125nt difference between them. In isoform pairs where the type of PAS element switches, 71% have a shorter isoform with a variant PAS element and a longer isoform with a canonical PAS element with an average of 209nt between them while the remaining 29% have a canonical PAS element on the shorter isoform and a variant PAS element on the longer isoform with an average of 322nt between them. B) In genes with three or more 3'UTR isoforms, genes where the longest and the shortest isoform both have canonical PAS elements have an average of 163nt between them while genes where the longest and the shortest isoforms both have variant PAS elements have an average of 211nt between them. 72% of genes switch from a variant PAS elements in the short isoform to a canonical PAS element in the long isoform, with an average of 181nt between them. 28% of genes have canonical PAS elements in the short isoforms and variant PAS elements in the long 3'UTR isoform, with an average of 211nt between the two.



**A****Genes with 1 3'UTR isoform (stringent – cluster  $\geq 100$  reads)**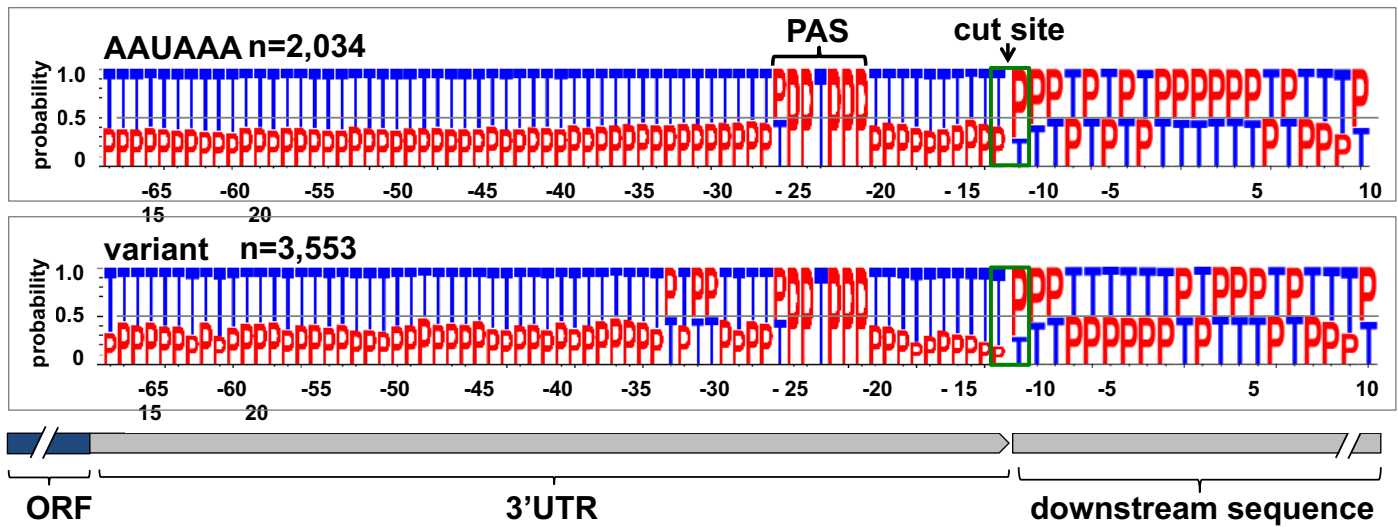**B****Genes with 1 3'UTR isoform****Genes with 2 3'UTR isoforms (only distal) (n=785)**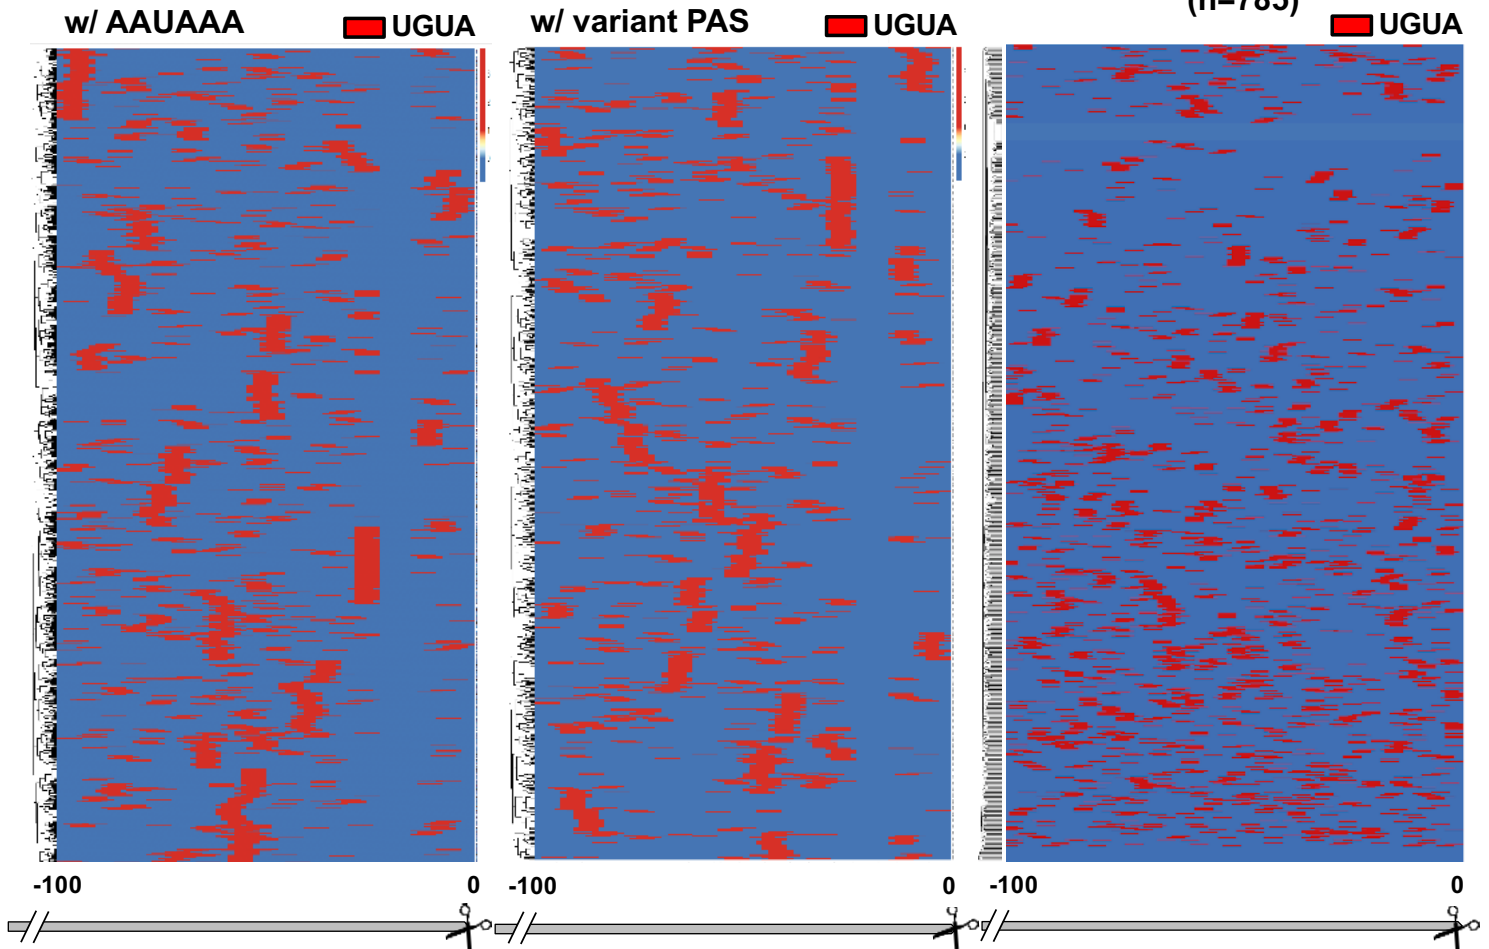

**Supplemental Fig. S5: Detection of the 'UGUA' element in *C. elegans* 3'UTRs.** A) Logo plot of genomic region within the cut site in genes with only one 3'UTR isoform and with canonical or variant PAS element. There are not immediate elements visible. (T) = Pyrimidine, (P) = Purine. B) Identification of the 'UGUA' motif (red) within 100nt upstream of the cleavage site in genes with one or two 3'UTR isoforms.

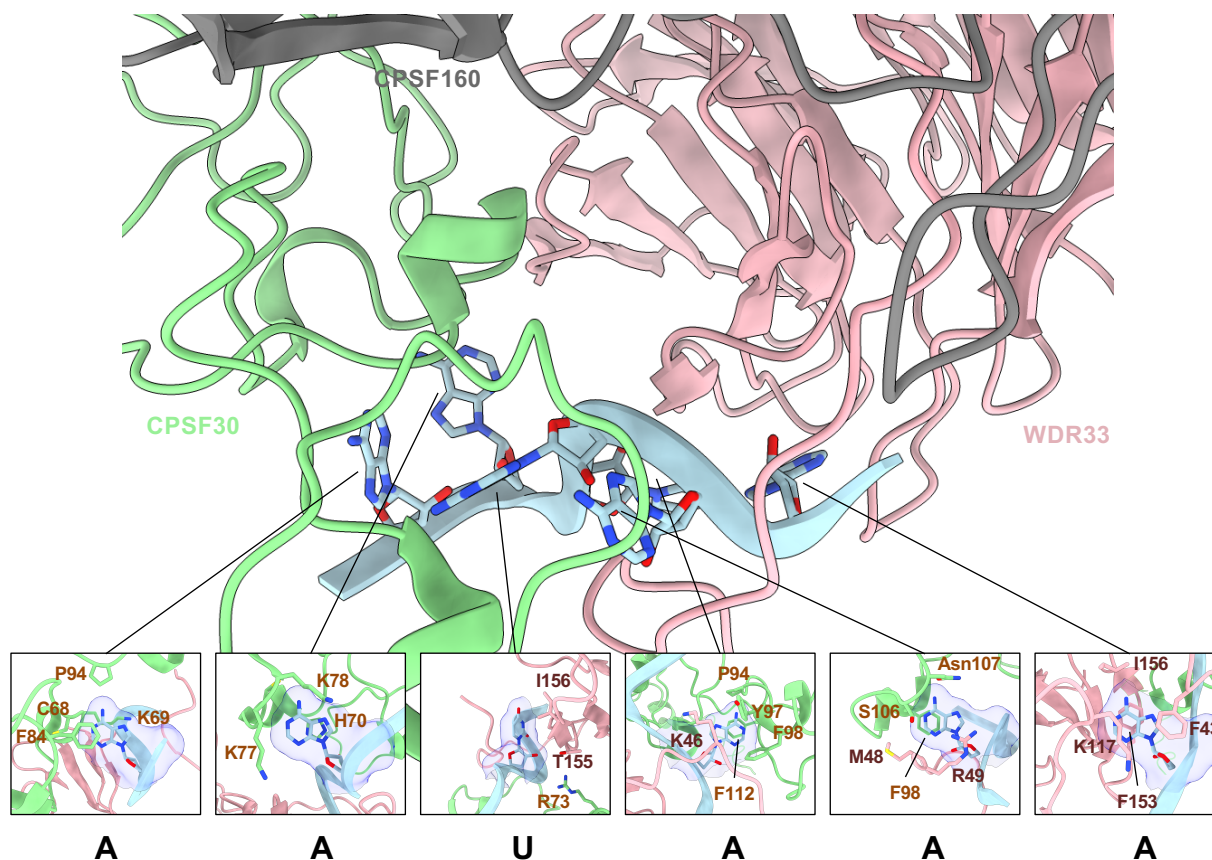

**Supplemental Fig. S6: Nucleotide binding site of the human CPSF160-WDR33-CPSF30 complex.** Ribbon representation of the cryo-EM structure of human CPSF160-WDR33-CPSF30 complex (PDB code: 6DNF) (Sun et al., 2018). The nucleotides of the bound RNA fragment do not show a specific interaction with either CPSF30 or WDR33. The interactions are mostly established by  $\pi$ - $\pi$  ring stacking. Color gray shows the CPSF160, pink for WDR33, and light green for CPSF30. Sticks represent the RNA molecules bound with CPSF30 and WDR33. Surfaces in the insets are for individual nucleotides.

**A** M03A1.3 wt 3'UTR

TGAAAGGACCTGCAGTGTTTTGGGCGATTGGAGTATTCTTCTGCATTGCT  
 GTTGC GTTGTCACTTCTTGTGTCGTC AATGGATATAAAAAATGTA TAA TTATT  
 AATGGAATTTTGGAAATCTCATCTAATTTTATTGATTTTATTGAATACGGGT  
 AGTTTCTGATAATTACTTTGCATTGTAAAAAACAAACTTTGTATGAATA  
 AACATATTGAACATCT **AA**GTGCTTGC GTTTTTTTTAAACTCAACTTTGGTT  
 GGCATATCTTGGCTCTCTTTAGTTTTTATTAAAAAATGTCAACTACAGA

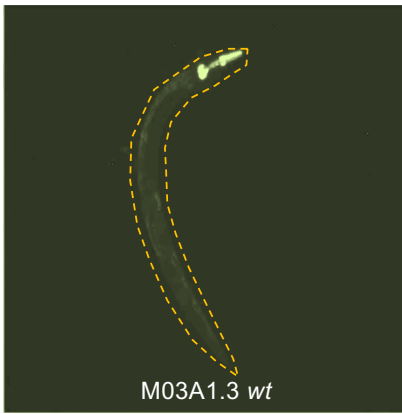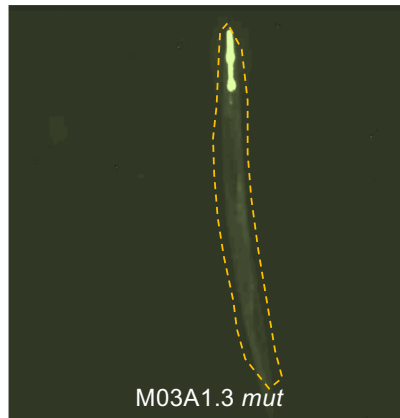

**B**

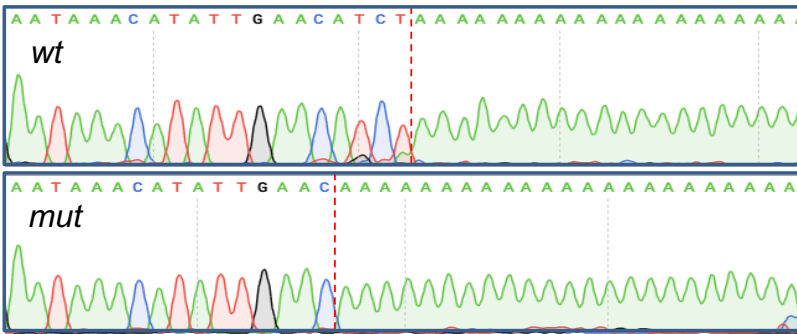

**C**

M03A1.3 wt 3'UTR

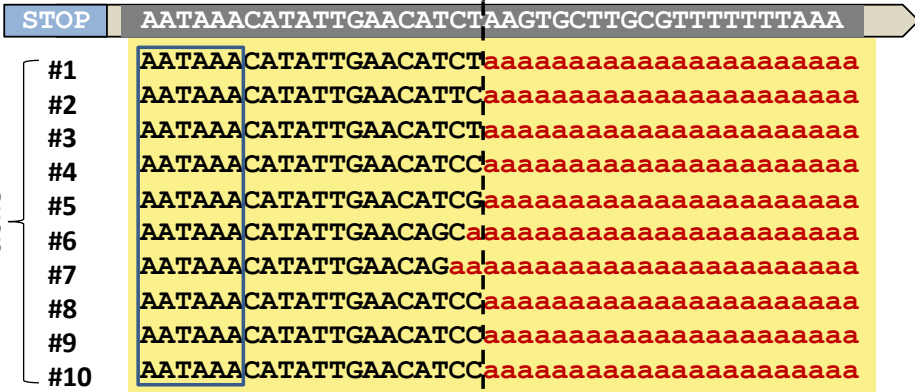

M03A1.3 mut 3'UTR

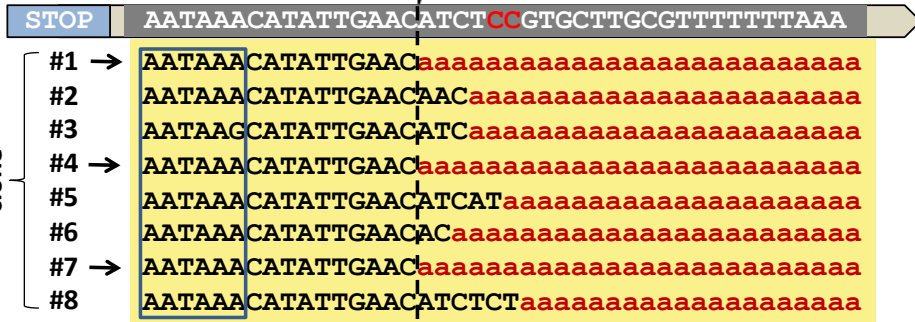

**Supplemental Fig. S7: In vivo cleavage assay for M03A1.3**

A) M03A1.3 genomic region cloned downstream of the GFP reporter. Blue: terminal portion of the M03A1.3 ORF. Green: STOP codon. Gray: 3'UTR. Red: mutated terminal Adenosine nucleotides. The transgenic worms expressing the pmyo-3::GFP::M03A1.3\_3'UTR wt and mutant cassette are shown below.

B) At the completion of the experiment, we recovered the total RNA and performed RT-PCR experiments using a forward primer annealing within the GFP ORF and a reverse polydT primer with two anchors containing Invitrogen Gateway adapters. The resultant amplicons were then subcloned in gateway vectors and sequenced to detect the cleavage site. An example of resultant trace files is shown.

C) Examples of 10 clones identified in this study for M03A1.3. The removal of the terminal genomic Adenosine nucleotide induces a cleavage site 3nt upstream of the canonical cleavage site in three clones (arrows), which also contain a terminal Adenosine nucleotide. The PAS element is boxed in blue color.

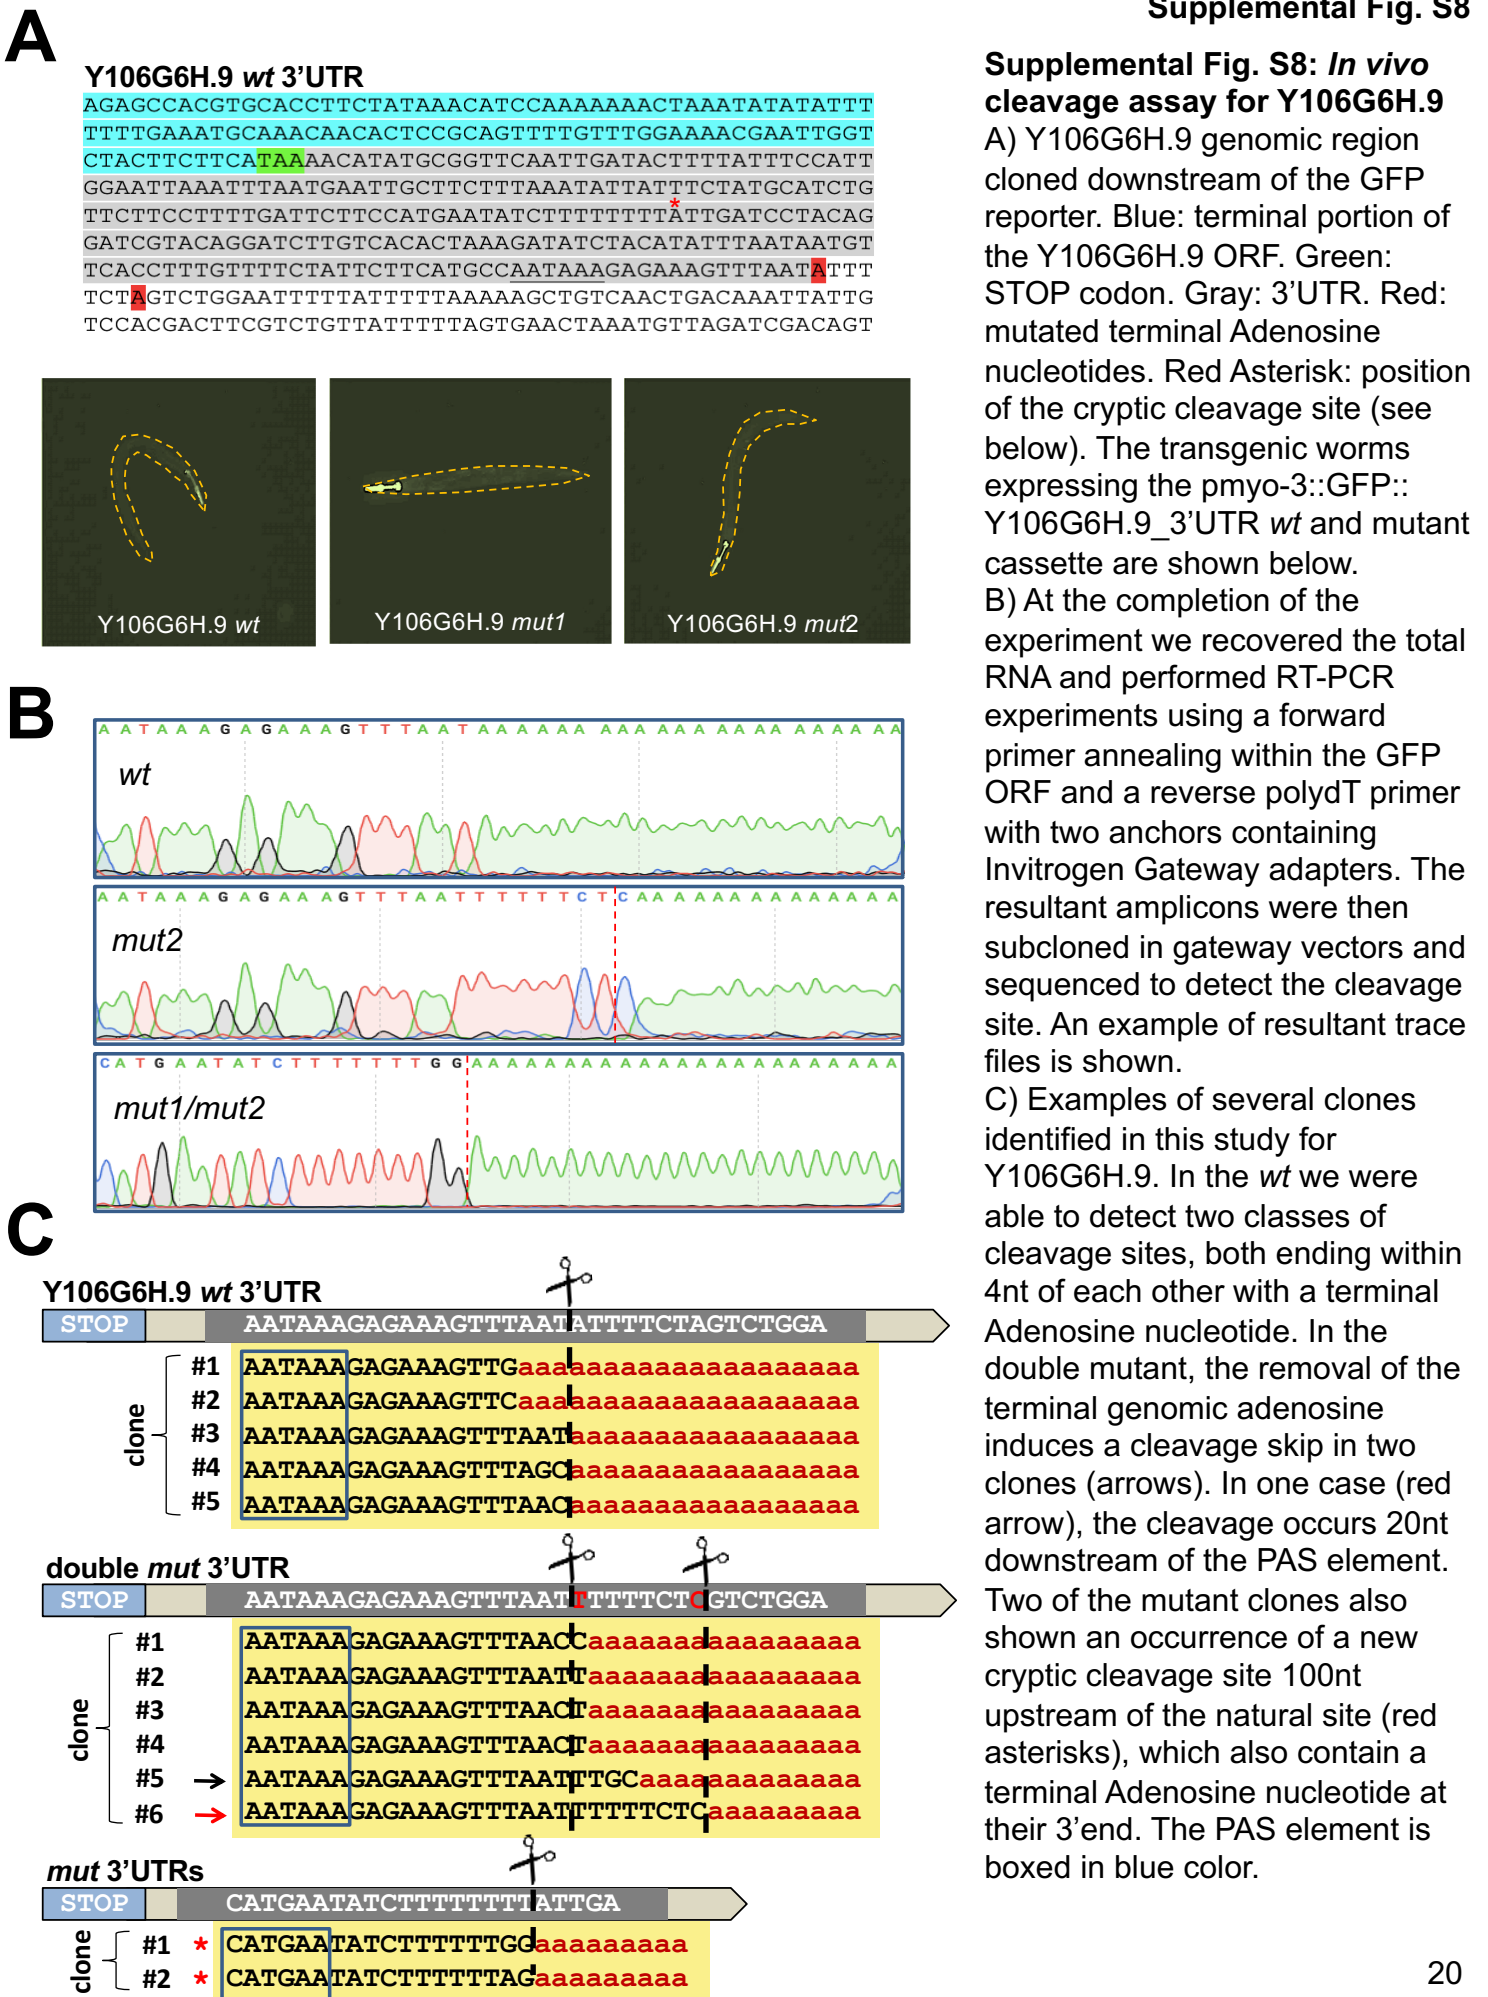

**A** *ges-1* wt 3'UTR

TCCAACTAATAGTGCCATGCATTTCGTCAAACAAGGACGAGCTGTAAAAAT  
 GCAATAAATTTATGTATTTAATTGATTTTCGAATAAATATACTTTTGCTAC  
 AAAATCTTCGGCAAATGCTCATGCTCGATTTCTCCCGCCAATTGAGCACC  
 TGTCAATTTATCTTGTCAATTTTCTGTACAAACACTTCTTGCCCCGACCA

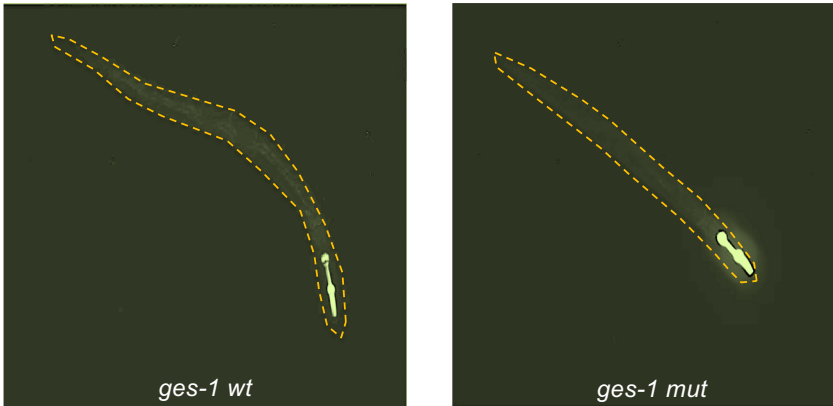

**Supplemental Fig. S9: *In vivo* cleavage assay for *ges-1***

A) *ges-1* genomic region cloned downstream of the GFP reporter. Blue: terminal portion of the *ges-1* ORF. Green: STOP codon. Gray: 3'UTR. Red: mutated terminal Adenosine nucleotides. The transgenic worms expressing the *pmyo-3::GFP::ges-1\_3'UTR wt* and mutant cassette are shown below.

B) At the completion of the experiment we recovered the total RNA and performed RT-PCR experiments using a forward primer annealing within the GFP ORF and a reverse polydT primer with two anchors containing Initrogen Gateway adapters. The resultant amplicons were then subcloned in gateway vectors and sequenced to detect the cleavage site. An example of resultant trace files is shown.

C) Examples of 10 clones identified in this study for *ges-1*. The removal of the terminal genomic Adenosine nucleotide does not alter the cleavage site but makes it more variable. The PAS element is boxed in blue color.

**B**

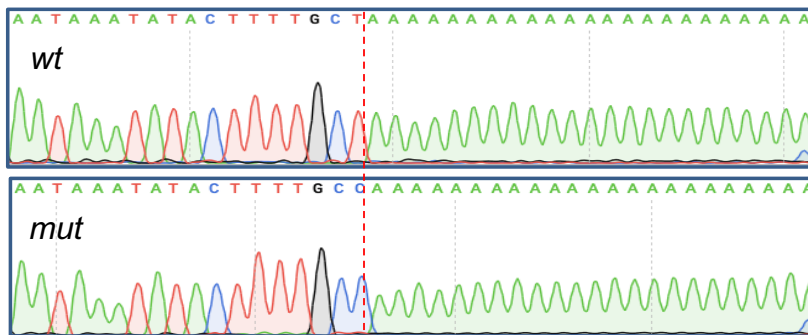

**C**

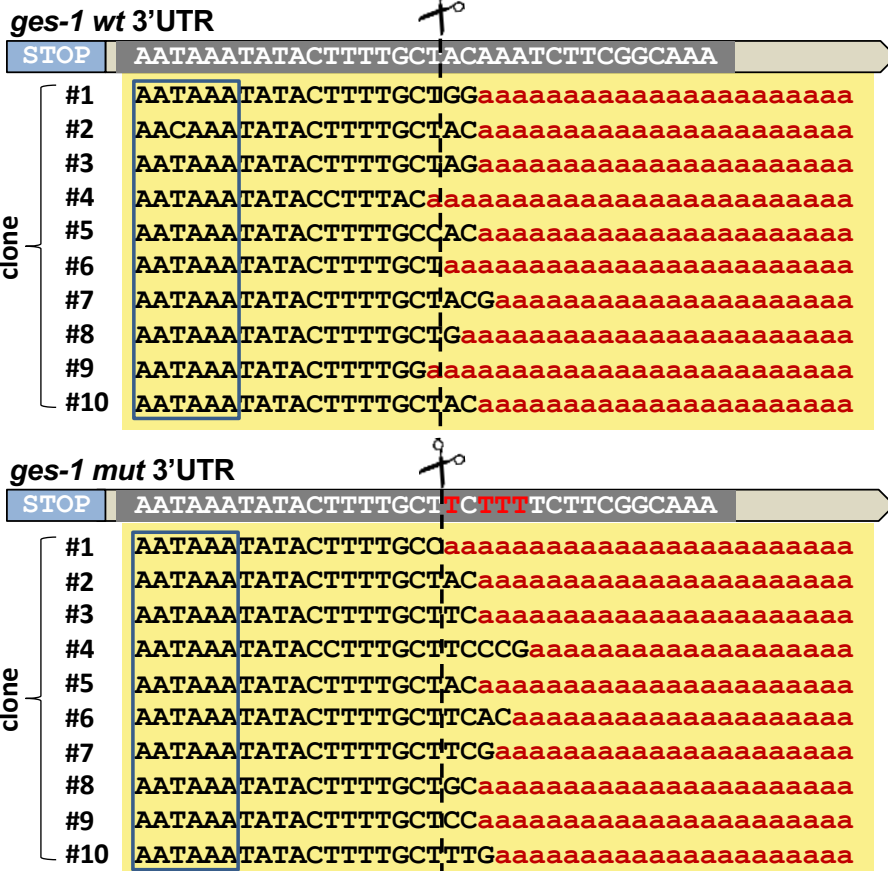

Supplement: Supplementary file [file media-1.pdf]
